1 **TITLE:** Distinct mechanisms of microRNA sorting into cancer cell-derived extracellular  
2 vesicle subtypes

3

4 Morayma M. Temoche-Diaz<sup>1</sup>, Matthew J. Shurtleff<sup>1,2</sup>, Ryan M. Nottingham<sup>3</sup>, Jun Yao<sup>3</sup>, Raj P.  
5 Fadadu<sup>2</sup>, Alan M. Lambowitz<sup>3</sup>, Randy Schekman<sup>2</sup>

6 <sup>1</sup>Department of Plant and Microbial Biology, University of California, Berkeley, United  
7 States; <sup>2</sup>Department of Molecular and Cellular Biology, Howard Hughes Medical Institute,  
8 University of California, Berkeley, United States, <sup>3</sup>Institute for Cellular and Molecular  
9 Biology and Department of Molecular Biosciences, University of Texas, Austin, United  
10 States.

11

12 **ABSTRACT**

13

14 Extracellular vesicles (EVs) encompass a variety of vesicles secreted into the extracellular  
15 space. EVs have been implicated in promoting tumor metastasis, but the molecular  
16 composition of tumor-derived EV sub-types and the mechanisms by which molecules are  
17 sorted into EVs remain mostly unknown. We report the separation of two EV sub-  
18 populations from a metastatic breast cancer cell line, with biochemical features consistent  
19 with different sub-cellular origins. These EV sub-types use different mechanisms of miRNA  
20 sorting (selective and non-selective), suggesting that sorting occurs via fundamentally  
21 distinct processes, possibly dependent on EV origin. Using biochemical and genetic tools,  
22 we identified the Lupus La protein as mediating sorting of some selectively packaged  
23 miRNAs. We found that two motifs embedded in miR-122 are responsible for high-affinity

24 binding to Lupus La and sorting into vesicles formed in a cell-free reaction. Thus, tumor  
25 cells can simultaneously deploy multiple EV species using distinct sorting mechanisms that  
26 may enable diverse functions in normal and cancer biology.

27

## 28 **INTRODUCTION**

29

30 Extracellular vesicles (EVs) are membranous compartments that consist of a lipid  
31 bilayer with a unique set of transmembrane proteins enclosing soluble contents that  
32 include nucleic acids and proteins (Colombo, Raposo, and Thery 2014). EVs are found in  
33 biofluids as well as in conditioned media of cultured cells (Pisitkun, Shen, and Knepper  
34 2004; Caby et al. 2005; Admyre et al. 2007; Vella et al. 2007). Cells release an array of EV  
35 sub-populations, and it has been shown that different EV sub-populations carry different  
36 protein (Kowal et al. 2016) and RNA signatures (Tosar et al. 2015). Moreover, distinct EV  
37 sub-populations have been implicated in mediating various physiological responses  
38 (Willms et al. 2016). Broadly, EV sub-populations can be classified into two categories:  
39 exosomes and shedding vesicles, distinguished by the cell membrane of origin. Exosomes  
40 are 30-150 nm vesicles that originate in the endocytic pathway. Their secretion to the  
41 extracellular space occurs upon multivesicular body (MVB) fusion with the plasma  
42 membrane resulting in the release of intraluminal vesicles (ILVs) to the extracellular space  
43 (Harding, Heuser, and Stahl 1983; Pan et al. 1985). Shedding vesicles, or microvesicles,  
44 refer to a more heterogeneous group of EVs, with sizes ranging from 30 to 1,000nm, which  
45 originate by budding directly from the plasma membrane (Cocucci, Racchetti, and  
46 Meldolesi 2009). Despite the current knowledge of EV heterogeneity, most current  
47 methods used to isolate EVs do not distinguish between sub-populations, nor do they

48 separate EVs from protein and RNA-protein complexes (RNPs) that are not EV  
49 encapsulated (Shurtleff, Temoche-Diaz, and Schekman 2018). New methods to facilitate the  
50 purification of EV sub-populations are needed in order to evaluate the physiological role  
51 and mechanism of macromolecular sorting into each species.

52

53         The lipid membrane of EVs confers protection to its soluble contents against  
54 extracellular hydrolases, thus increasing their stability in the extracellular space. The EV  
55 soluble content consists of a variety of proteins as well as small RNA molecules (Raposo  
56 and Stoorvogel 2013). Among the EV resident transcripts, miRNAs have garnered special  
57 attention. MiRNAs are ~22 nucleotide transcripts that modulate gene expression at the  
58 post-transcriptional level (Bartel 2004). Although the functional importance of EV-miRNAs  
59 as signaling molecules has received some support, including in immunologic response and  
60 metastatic tumor cell growth (Mittelbrunn et al. 2011; Montecalvo et al. 2012; Pegtel et al.  
61 2010; Fong et al. 2015; Dickman et al. 2017; Zhou et al. 2014; Tominaga et al. 2015; Hsu et  
62 al. 2017), the molecular mechanisms and regulation of sorting miRNAs into EVs remain  
63 poorly understood. Both non-selective (Tosar et al. 2015) and selective (Shurtleff et al.  
64 2016; Santangelo et al. 2016; Villarroya-Beltri et al. 2013) mechanisms of miRNA sorting  
65 into EVs have been described. One study using two breast epithelial cell lines found that  
66 non-selective miRNA sorting occurs in one EV sub-population, referred to as “large-  
67 exosomes”, whereas a selective mechanism of sorting occurs in the smaller EV sub-  
68 population (Tosar et al. 2015). The cell membrane origin of these two species was not  
69 investigated.

70

71 Cancer cells produce more EVs than their non-transformed counterparts  
72 (Szczepanski et al. 2011; Rodriguez et al. 2014). Thus, EVs have been the focus of attention  
73 in the context of cancer biology. Several studies have implicated EVs in cancer metastasis  
74 (Peinado et al. 2017). EVs have been proposed to increase the metastatic potential of  
75 cancer cells and to prepare the pre-metastatic niche prior to tumor cell arrival.  
76 Importantly, some studies suggest these effects are due to exosomal-mediated miRNA  
77 transfer (Fong et al. 2015; Zhou et al. 2014; Tominaga et al. 2015; Rana, Malinowska, and  
78 Zoller 2013; Hsu et al. 2017). However, due to the heterogeneity of EVs and the procedures  
79 use to isolate them, it is unclear which vesicle subtypes may mediate these processes.

80  
81 To gain knowledge of the molecular mechanisms behind miRNA sorting into distinct  
82 EV sub-populations, we used as a model the highly invasive breast cancer cell line MDA-  
83 MB-231. We used buoyant density gradient centrifugation to resolve two distinct EV sub-  
84 populations and found they contain different subsets and levels of enrichment of various  
85 miRNAs. With the aid of a cell-free reaction that recapitulates the sorting of miRNAs into  
86 vesicles formed *in vitro* (Shurtleff et al, 2016), we found that the Lupus La protein (La  
87 protein) is required for the sorting of two different miRNAs found in the high buoyant  
88 density EV species, a conclusion that was confirmed in cells repressed for the expression of  
89 the La protein. These two La-dependent miRNAs were previously reported to be  
90 selectively sorted into EVs to promote cancer metastasis (Fong et al. 2015; Dickman et al.  
91 2017). Further, using the cell-free reaction, we identified two La-binding motifs that are  
92 required for the selective sorting of miR-122 *in vitro*. Overall, our use of biochemical  
93 fractionation and *in vitro* reconstitution enabled us to identify La as another one of the

94 RNA-binding proteins required for the selective packaging of some miRNAs into EVs.

95

## 96 **RESULTS**

97

### 98 **Two biochemically distinct extracellular vesicle sub-populations are released by** 99 **MDA-MB-231 cells**

100 To examine the miRNA content of EVs released by the metastatic breast cancer cell  
101 line MDA-MB-231, we first sought to separate EVs from contaminating RNA and protein  
102 species that co-sediment during common EV isolation procedures (Shurtleff, Temoche-  
103 Diaz, and Schekman 2018) . To achieve this goal, we developed an EV purification strategy  
104 involving differential ultracentrifugation followed by buoyant density flotation on a linear  
105 iodixanol gradient (Figure 1a and figure 1 – figure supplement 1). This approach allowed  
106 the resolution of two distinct EV species, termed the low density (LD) and high density  
107 (HD) sub-populations (Figure 1b). Nanoparticle tracking analysis of the two EV sub-  
108 populations demonstrated that vesicle sizes largely overlapped, with HD vesicles (114.1  
109 nm mean diameter) being slightly smaller on average than LD vesicles (121.8 nm mean  
110 diameter) (Figure 1c). The HD sub-population had densities ranging from 1.13-1.15 g/ml  
111 as was reported for exosomes (Colombo, Raposo, and Thery 2014). Furthermore, CD63, a  
112 tetraspanin enriched in MVBs and an exosomal marker, was present in the HD fraction  
113 (Figure 1b) as were other endosome-associated proteins identified by mass spectrometry  
114 (Figure 2 – source data 1). The LD sub-population had a density ranging from 1.08-1.10  
115 g/ml and lacked the CD63 signal (Figure 1b) as well as endosome-associated proteins as  
116 judged by mass spectrometry (Figure 2 – source data 1).

117 Gene ontology analysis for sub-cellular localization of the proteins detected in the  
118 HD sub-population by mass spectrometry clustered the terms exosomes and endosomes  
119 together (Fig 2a). The LD-detected proteins showed exosomal marker proteins, but  
120 endosomal markers were not found at statistically significant levels (Fig 2b). Thus we  
121 hypothesize that the HD and LD vesicles have different sub-cellular origins.

122

123 The Rab27a protein is involved in the fusion of MVBs to the plasma membrane,  
124 regulating in this way exosomal secretion (Ostrowski et al. 2010). We created a Rab27a  
125 knock out cell line by using CRISPR-Cas9 technology (Fig 2c). Extracellular vesicles were  
126 isolated from conditioned medium of WT and Rab27a knock out cells and analyzed by  
127 immunoblot for the levels of two tetraspanins defining the two EV sub-populations: CD63  
128 as a protein marker defining the HD sub-population and CD9 defining the LD sub-  
129 population (Figure 1b). EVs derived from the Rab27a KO background showed a dramatic  
130 decrease of CD63 signal, while secreting seemingly similar levels of CD9-positive vesicles  
131 (Figure 2d) in comparison to the WT levels. Our results are in accordance with a previous  
132 study showing that the secretion of CD63-positive, but not of CD9-positive vesicles, is  
133 Rab27a dependent (Bobrie et al. 2012).

134

135 The Rab35 protein has also being implicated in mediating exosomal secretion in  
136 oligodendrocytes (Hsu et al. 2010). Thus, we created a Rab35 knock out cell line (Figure  
137 2c). When EVs derived from the Rab35 KO background were probed for CD63 and CD9  
138 signals, no apparent difference was observed in comparison to EVs derived from WT cells  
139 (Figure 2d). Thus, Rab27a but not Rab35, is involved in the secretion of CD63-positive

140 vesicles derived from MDA-MB-231 cells. Collectively, our data are most consistent with  
141 HD vesicles having their origin in the endocytic pathway, whereas LD vesicles may bud  
142 directly from the plasma membrane.

143  
144 We next probed the small RNA content of the separated vesicle fractions. An initial  
145 qualitative assessment of RNA profiles using a Bioanalyzer showed that both LD and HD  
146 sub-populations share a predominant peak at ~70 nucleotides (Figure 1d), which later  
147 proved to correspond to tRNAs (Figure 3 – figure supplement 2d). However, there was an  
148 apparent enrichment of transcripts smaller than 70 nucleotides in the HD sub-population  
149 (Figure 1d) that we hypothesized represented miRNAs. As such, we considered the  
150 possibility that the distinct EV sub-populations might differ in their miRNA content.

151  
152 **Distinct molecular mechanisms of miRNA sorting govern the discrete extracellular**  
153 **vesicle sub-populations.**

154 To further analyze the miRNA content of the HD and LD vesicles, we used two  
155 orthogonal approaches: targeted miRNA profiling and an unbiased sequencing approach.  
156 Using the commercially available Firefly particle technology, Discovery Panel (Abcam), we  
157 compared the abundance of 408 miRNAs in the LD and HD EV sub-populations. Out of the  
158 ~400 tested miRNAs, 312 showed a detectable signal in the HD sub-population and 217  
159 were detected in the LD counterpart. We found 21 miRNAs present in the HD vesicles that  
160 were enriched at least 10-fold in comparison to their intracellular levels (Figure 3a). In  
161 contrast, only 2 miRNAs detected in the LD sub-population showed over a 10-fold change  
162 relative to cell lysate (Figure 3b). Both of the apparent LD-enriched miRNAs were also

163 present as highly enriched in the HD sub-population (Figure 3a). Their enrichment in the  
164 LD sub-population was much lower than in the HD sub-population (Figure 3 – figure  
165 supplement 2), suggesting their detection in the LD subpopulation may have been the  
166 result of small amounts of HD vesicles co-fractionating with the LD vesicles during  
167 flotation. Validation by RT-qPCR suggested that these enriched miRNAs were highly  
168 specific to the HD sub-population (Figure 3c), confirming our initial suspicion.

169  
170 As an orthogonal and unbiased approach to profile EV miRNA, we used  
171 thermostable group II intron reverse transcriptase sequencing (TGIRT-seq). The TGIRT  
172 enzyme is a thermostable, highly processive reverse transcriptase with a proficient  
173 template-switching activity used for RNA-seq adapter addition (Mohr et al. 2013). This  
174 enzyme's properties allowed us to generate comprehensive cDNA libraries that included  
175 highly structured and modified transcripts. Also due to its properties, TGIRT allows the  
176 generation of cDNA libraries from low input material (Qin et al. 2016b; Shurtleff et al.  
177 2017). The data obtained from TGIRT-seq was normalized to total number of small non-  
178 coding RNA reads per sample. As previously described for EVs using TGIRT-seq (Shurtleff  
179 et al. 2017), we found that miRNAs represented a relatively low proportion of total reads  
180 (3.4% and 1% of the mapped reads for HD and LD, respectively), resulting in detection of  
181 fewer miRNAs by TGIRT-seq than by Firefly profiling. Nevertheless, TGIRT-seq  
182 recapitulated the general trends observed by Firefly: multiple miRNAs enriched by at least  
183 10-fold in the HD sample compared to cells (Figure 3 – figure supplement 2a) and fewer  
184 enriched miRNAs in the LD sample compared to cells (Figure 3 – figure supplement 2b).  
185 Out of the 4 apparent LD enriched miRNAs detected by TGIRT-seq, 3 were also detected as



186 highly enriched in the HD sub-population, suggesting again that their presence was a result  
187 of carryover material overlapping the buoyant density gradient fractions. The total number  
188 of uniquely detected HD miRNAs by TGIRT-seq (detectable in the HD sample, but absent in  
189 the intracellular lysate) was 21. Comparatively, only 5 miRNAs were uniquely found in the  
190 LD sub-population (Figure 3 – figure supplement 2c).

191

192 In agreement with our previous findings (Shurtleff et al. 2017), we found that the  
193 most abundant small non-coding transcripts in EVs are tRNAs (representing 88.6% of HD  
194 and 96.3% of LD transcripts – Figure 3 – figure supplement 2d). We found that most of the  
195 tRNA reads in both EV sub-populations start at approximately position 16 (Figure 3- figure  
196 supplement 2e), which may represent a reverse transcription stop at the same unidentified  
197 EV-enriched D-loop modification described previously (Shurtleff et al. 2017). Thus, both EV  
198 sub-populations share a modified tRNA version as their most abundant small non-coding  
199 transcript.

200

201 We next validated the top EV-enriched/unique miRNAs per vesicle sub-population  
202 using RT-qPCR. Relative levels for each EV sub-population were compared to intracellular  
203 levels. We found that all of our top HD candidates were validated by this method. As  
204 expected, the tested HD miRNAs were highly enriched in the HD EV sample relative to the  
205 intracellular levels. The HD/intracellular lysate ratio ranged from ~50-fold to ~1,000-fold  
206 (Figure 3c). In contrast, none of our top LD miRNA candidates were validated as being  
207 highly enriched in comparison to their intracellular levels. The LD/intracellular lysate ratio  
208 ranged from ~0.5-fold to ~5-fold (Figure 3d). We then compared relative levels for each

209 EV sub-population to each other in order to test for miRNA vesicle specificity. HD-enriched  
210 miRNAs were highly depleted in the LD vesicles, as seen by >10-fold increase in their  
211 HD/LD ratio (Figure 3c). In contrast, the tested LD miRNAs had roughly the same  
212 abundance or were depleted in comparison to their relative levels in HD vesicles (Figure  
213 3d). This proved to be true not only for the few miRNAs tested by RT-qPCR, but was also a  
214 general trend for multiple miRNAs detected by Firefly profiling, which demonstrated that  
215 many miRNAs were more abundant in the HD vesicles than in their LD counterpart (Figure  
216 3e). All of this together suggested that a selective mechanism of miRNA sorting occurs in  
217 the HD sub-population with much less or no miRNA selective sorting in the LD pool.

218

219       Highly enriched (>50-fold change HD/cellular lysate) and specific (>50-fold change  
220 HD/LD) HD miRNAs were then tested to confirm that they were bona fide EV residents, and  
221 not simply EV-associated. The high-speed pellet fraction was exposed to ribonuclease in  
222 the absence or presence of non-ionic detergent. All of the highly enriched, specific HD  
223 miRNAs tested proved to be EV encapsulated: they were resistant to RNase in the absence  
224 but not the presence of detergent (Figure 3f).

225

226       These results suggest that a selective miRNA sorting mechanism into EVs occurs in  
227 the biogenesis of the HD sub-population but less so or not at all in the LD sub-population.  
228 Thus, we identified two distinct EV sub-populations that are released by MDA-MB-231 cells  
229 that utilize fundamentally different miRNA sorting mechanisms (selective vs non-  
230 selective).

231

## 232 **Selective miR-122 sorting into vesicles is recapitulated *in vitro***

233 We selected miR-122 for further biochemical analysis as it has been shown that  
234 circulating miR-122 can serve as a prognostic biomarker for metastasis in patients with  
235 breast cancer (Wu et al. 2012) and very specifically that MDA-MB-231 cell-derived  
236 exosomal miR-122 may promote metastasis by reprogramming glucose metabolism in the  
237 premetastatic niche (Fong et al. 2015). Because miR-122 is present in the fetal bovine  
238 serum (FBS) used to culture cells (Wei et al. 2016), we employed clarified FBS depleted of  
239 sedimentable particles to confirm that the miR-122 was released by MDA-MB-231 cells. We  
240 observed an accumulation of miR-122 over time in conditioned media exposed to MDA-  
241 MB-231 cells, whereas the level of miR-122 slightly decreased over time when conditioned  
242 media was incubated in the absence of cells (Figure 4 – figure supplement 1). This  
243 suggested that newly synthesized MDA-MB-231 cell-derived miR-122 was secreted into the  
244 extracellular space.

245

246 To explore the mechanism(s) by which miR-122 is selectively sorted into the MDA-  
247 MB-231 HD EV sub-population, we first sought to recapitulate miR-122 packaging *in vitro*.  
248 An assay for the cell-free packaging of a miRNA into putative exosomal vesicles was  
249 previously developed in our laboratory (Shurtleff et al. 2016). The reaction includes  
250 sedimented membranes and clarified cytosol, obtained from mechanically ruptured  
251 HEK293T cells, along with synthetic miRNA and ATP. After an incubation of 20 min at  
252 30°C, RNA incorporated into vesicles was monitored by protection against degradation by  
253 exogenous RNase. Protected RNA was then extracted and quantified by RT-qPCR. The  
254 outcome of the reaction is represented as the percentage of initial input miRNA that has

255 become protected over the incubation period (Figure 4a). Using a modified version of our  
256 previously published reaction, we found that maximum protection of miR-122 in lysates of  
257 MDA-MB-231 cells required membranes, cytosol and incubation at a physiological  
258 temperature (Figure 4b), as was previously observed for miR-223 in lysates of HEK293T  
259 cells (Shurtleff et al. 2016). Therefore, miR-122 packaging into vesicles in lysates of MDA-  
260 MB-231 cells may be recapitulated *in vitro*.

261

### 262 **Identifying *in vitro* miR-122 RNA-binding protein partners**

263 Having detected miR-122 packaging *in vitro*, we next sought to utilize this approach to  
264 study the mechanism of miR-122 sorting into MDA-MB-231 EVs. We first tested if miR-122  
265 packaging was YBX1-dependent. YBX1 is a RNA-binding protein (RBP) previously found to  
266 be required for miR-223 packaging into vesicles *in vitro* and into EVs secreted by HEK293T  
267 cells (Shurtleff et al. 2016). Using membranes and cytosol from WT and *ybx1* null HEK293T  
268 cells, we repeated the demonstration that miR-223 packaging was YBX1-dependent, but  
269 found that miR-122 was packaged nearly normally in lysates devoid of YBX1 protein  
270 (Figure 4c).

271

272 Several RBPs have been implicated in miRNA sorting into EVs from different cell types  
273 (Shurtleff et al. 2016; Mukherjee et al. 2016; Santangelo et al. 2016; Villarroya-Beltri et al.  
274 2013). As such, in order to study the RBP(s) that might mediate miR-122 packaging in  
275 MDA-MB-231 cells, we performed an *in vitro* packaging reaction employing a 3'-  
276 biotinylated form of miR-122 to allow the capture of the miRNA and any bound proteins.  
277 Briefly, following *in vitro* packaging, reactions were treated with RNase, the RNase activity

278 was quenched and the membranes solubilized with Triton X-100. Once the luminal content  
279 was released, biotinylated miR-122, along with its protein interactors, was captured with  
280 streptavidin beads. Proteins were eluted with Laemmli buffer, extracted from a SDS-  
281 polyacrylamide gel and the eluted fraction used for mass spectrometry. The proteins  
282 detected by mass spectrometry were curated for RBPs, except that any ribosomal proteins  
283 were excluded (Figure 4d). We decided to focus on the top three candidates, nucleolin  
284 (NCL), Lupus La (La) and nucleophosmin (NPM1). These three RBPs have been reported to  
285 be present in crude high-speed pellet preparations from conditioned media from different  
286 carcinoma cell lines (Liang et al. 2013; Demory Beckler et al. 2013), including from our  
287 model cell line MDA-MD-231 (Skottvoll et al. 2018).

288  
289 Notably, Ago2 was not detected bound to miR-122 in our mass spectrometry results.  
290 This was not simply an artifact of our *in vitro* system, as Ago2 was also undetectable in  
291 immunoblots of the buoyant density fractionated EV membranes (Figure 4 – figure  
292 supplement 2). Both Ago2 and Dicer were present in the high-speed pellet, but not as  
293 buoyant species, suggesting they are associated with co-purifying RNP complexes that are  
294 not vesicle-associated. This finding is in accordance with other published data (Shurtleff et  
295 al. 2016; Van Deun et al. 2014) where Ago2 is detected in the high-speed pellet but absent  
296 in the vesicle sample after more stringent purification methods are used.

297  
298 To test the relevance of the three RBPs in miR-122 packaging into EVs, we used  
299 CRISPR interference (CRISPRi) (Gilbert et al. 2013; Horlbeck et al. 2016) to systematically  
300 knock down each protein in MDA-MB-231 cells. CRISPRi promotes gene silencing by

301 repressing transcription of the target gene. Importantly, unlike siRNA or shRNA, CRISPRi  
302 silences genes independently of the RISC machinery. Because the RISC machinery binds to  
303 miRNAs and is responsible for miRNA-mediated gene silencing (Bartel 2004), we avoided  
304 any artificial overload of the RISC machinery that might result in unpredictable effects on  
305 the miRNA sorting in our system.

306

307 Using CRISPRi, we prepared cytosols from MDA-MB-231 cells depleted of  
308 nucleophosmin and La that were then used in the *in vitro* packaging reactions. Both  
309 nucleophosmin and La were efficiently knocked down using this system (Figure 4 – figure  
310 supplement 3a). However, nucleolin knock-down resulted in apparent cellular arrest with  
311 subsequent cell death. Thus, nucleolin functional analysis was not possible by knock-down.  
312 Nucleophosmin-depleted cytosol produced a mild packaging phenotype only at reduced  
313 cytosol concentrations (3 mg/ml) (Figure 4 – figure supplement 3b). In contrast, La-  
314 depleted cytosol showed severely reduced miR-122 packaging efficiency at cytosolic  
315 concentrations of 3 and 6 mg/ml in the cell-free reactions (Figure 4 – figure supplement 3b  
316 and Figure 5a). Thus, these experiments suggested a role for La in the packaging of miR-  
317 122 into vesicles formed *in vitro*.

318

### 319 **Packaging of miR-122 *in vitro* is La-dependent**

320 La is an abundant RNA-binding protein that shuttles between the nucleus and  
321 cytoplasm. Within the nucleus, La helps stabilize RNA polymerase III (PolIII) transcripts by  
322 binding to poly-uridine tails in their 3' termini (Stefano 1984; Rinke and Steitz 1985; Wolin  
323 and Cedervall 2002). In the cytoplasm, La has been suggested to bind and regulate the

324 translation of 5' terminal oligopyrimidine (TOP) mRNAs (Intine et al. 2003; Cardinali et al.  
325 2003; Crosio et al. 2000). Moreover, in the context of cancer, La has been shown to shuttle  
326 from the nucleus to the cytoplasm at higher efficiencies in invasive cells undergoing  
327 epithelial to mesenchymal transition in order to control the translation of mRNAs bearing  
328 internal ribosome entry sites (IRES) (Petz, Them, Huber, Beug, et al. 2012; Petz, Them,  
329 Huber, and Mikulits 2012). La has also been indirectly implicated in the exosomal secretion  
330 of a small Epstein-Barr viral RNA, EBV-EBER1. EBV-EBER1 interaction with La in the  
331 cytoplasm masks the viral RNA from recognition by cytoplasmic surveillance machinery  
332 and facilitates its later EV-mediated secretion (Baglio et al. 2016).

333

334 In order to establish whether La itself, rather than a La-associated protein, is  
335 necessary for miR-122 incorporation into EVs *in vitro* (Figure 5a), recombinant His-tagged  
336 human La was expressed and purified from insect Sf9 cells (Figure 5 – figure supplement  
337 1). La-depleted cytosol was reduced ~4-fold in the packaging of miR-122 but was restored  
338 to normal on addition of purified, recombinant La to the combination of membranes and  
339 La-depleted cytosol (Figure 5b). However, addition of La alone with or without membranes  
340 and no cytosol resulted in only background protection of miR-122 (Figure 5b), suggesting  
341 that additional cytosolic proteins are necessary for *in vitro* vesicle biogenesis and/or  
342 miRNA sorting process. The level of exogenously added La protein in the *in vitro* reaction  
343 was adjusted to approximate the level found in an aliquot of the normal cytosol (Figure 5c).

344

345 We next examined the requirements for co-packaging of La and miR-122 in the cell-  
346 free reaction. An immunoblot was used to test the relative amount of La co-isolated with

347 biotinylated miR-122 in conditions that sustain or fail to result in miR-122 packaging. We  
348 observed maximal La recovery in incubations conducted with cytosol and membranes at  
349 30°C but much less so at 4°C (Figure 5d). Thus, the sorting of La bound to miR-122 requires  
350 the presence of both, membranes and cytosol, and a physiological temperature of  
351 incubation.

352

### 353 **MiR-122 packaging into EVs *in vivo* is La-dependent**

354 Our *in vitro* data suggested that La was at least one of the RBPs responsible for miR-  
355 122 packaging. However, in order to confirm this data, we first examined the effects of  
356 depletion of the three RBP candidates *in vivo*. Previous work has demonstrated that  
357 selected miRNAs accumulate in the cytoplasm in cells deficient in RBPs required for RNA  
358 sorting into EVs (Shurtleff et al. 2016; Santangelo et al. 2016; Villarroya-Beltri et al. 2013).  
359 We assessed the level of intracellular miR-122 and of another highly enriched miRNA (miR-  
360 142) upon CRISPRi depletion of each RBP candidate. Greater accumulation of miR-122 was  
361 seen upon La depletion (2.7-fold change La CRISPRi/WT) compared to nucleophosmin  
362 depletion (1.7-fold change NPM1 CRISPRi/WT) (Figure 6a). CRISPRi of nucleolin resulted  
363 in less cellular miR-122, which could be an indirect result of the more toxic effects of this  
364 depletion. As a control for selectivity of miRNA sorting and export, we assed the  
365 intracellular levels of non-selectively sorted miRNAs miR-574 and miR-320a (Figure 3d). In  
366 contrast to the selectively sorted miRNAs, we did not observe intracellular accumulation of  
367 miR-574 and miR-320a under any of the knock-down conditions (Figure 6a). At least in  
368 relation to La and nucleophosmin, the depletion results in cells confirmed our previous  
369 observations on the role of these proteins in our cell-free reaction.



370

371           We next examined the relative content of miR-122 and miR-142 and of a non-  
372 selectively sorted miRNA (miR-320a – Figure 3d) in EVs in relation to their accumulation in  
373 cells depleted of La. WT and La-depleted cells had approximately the same number of  
374 purified EVs as quantified using a Nanosight particle tracking instrument. A significant  
375 reduction in secretion of miR-122 and miR-142 with no change in miR-320a was  
376 accompanied by intracellular accumulation of miR-122 and miR-142 in the La-depleted  
377 background (Figure 6b). Thus, La plays a role in the selective sorting of at least two  
378 selectively packaged EV miRNAs without affecting EV biogenesis.

379

380           To test for the presence of La in EVs isolated from cultured MDA-MB-231 cells, we  
381 first purified vesicles by buoyant density flotation. The high-speed pellet was subjected to  
382 flotation in a step sucrose gradient. Buoyant membranes were permeabilized with non-  
383 ionic detergent and soluble proteins were precipitated/concentrated with acetone in order  
384 to facilitate detection by immunoblot (Figure 6c). We successfully detected the presence of  
385 La in the buoyant sample. Its detection was improved upon acetone  
386 precipitation/concentration (Figure 6d).

387

388           In order to confirm that La was a soluble protein residing inside EVs, and not simply  
389 vesicle-associated, we performed proteinase K protection assays on crude high-speed  
390 pellet material. The high-speed pellet fraction from conditioned medium was exposed to  
391 proteinase K in the presence or absence of detergent and the exposure of La was assessed  
392 by immunoblot. The La protein was resistant to proteinase K digestion and rendered

393 sensitive upon membrane permeabilization with non-ionic detergent (Figure 6c). Flotillin-  
394 2, a membrane protein associated with the inner leaflet of the EV, served as a positive  
395 control and was degraded only in the presence of detergent. In contrast, Dicer, previously  
396 shown to be present in the high-speed pellet but not as an EV-encapsulated RNP (Figure 4 –  
397 figure supplement 2), was susceptible to degradation independent of the addition of non-  
398 ionic detergent (Figure 6c). We conclude that the La protein is packaged into vesicles in our  
399 cell-free reaction as well as into EVs secreted by cells and is required for packaging of miR-  
400 122 into vesicles *in vitro* and *in vivo*.

401

#### 402 **La directly interacts with miR-122 *in vivo* and *in vitro***

403         Given our results on the role of La in miR-122 sorting in cells and in the cell-free  
404 reaction, we next examined the intracellular distribution of La and the selectivity of its  
405 interaction with miR-122 versus a control miRNA that was detected, but not enriched, in  
406 LD and HD vesicles (miR-182; Figure 3c). At steady-state, La was reported to be largely  
407 confined to the nucleus (Wolin and Cedervall 2002). However, other evidence supports a  
408 role for La function in the cytoplasm and its shuttling between the nucleus and cytoplasm  
409 (Cardinali et al. 2003; Intine et al. 2003; Petz, Them, Huber, Beug, et al. 2012; Petz, Them,  
410 Huber, and Mikulits 2012). Our observation of La as an EV resident protein (Figure 6d and  
411 6e) is consistent with at least some residence time in the cytoplasm.

412

413         Endogenous La was visualized by standard and structured illumination fluorescence  
414 microscopy (SIM) in fixed MDA-MB-231 cells. Immunofluorescence confirmed the presence  
415 of nuclear and cytoplasmic La (Figure 7 – figure supplement 1a). The specificity of the

416 antibody was affirmed by a significant depletion of the immunofluorescence signal in cells  
417 depleted of La by CRISPRi (Figure 7 – figure supplement 1a and 1b). At a higher level of  
418 resolution, SIM revealed cytoplasmic puncta of La, some of which co-localized with a late  
419 endosomal marker, Rab7 (Figure 7 – figure supplement 1c).

420

421 We evaluated the interaction of La with two miRNAs by co-immunoprecipitation  
422 from mechanically ruptured MDA-MB-231 cells. A post-nuclear supernatant fraction of  
423 cells was mixed with La antiserum and the IP sample was split for protein and RNA analysis  
424 by immunoblot and RT-qPCR, respectively (Figure 7a). Approximately 15% of the La  
425 protein and miR-122 was precipitated (Figure 7b and 7c). MiR-182, which is present but  
426 not enriched in LD and HD EVs, was used as a negative control and did not co-  
427 immunoprecipitate with La (Figure 7c).

428

429 In order to explore the interaction of La and miR-122 directly, we used purified,  
430 recombinant La incubated with miR-122 and evaluated the binding affinity by  
431 electrophoretic mobility shift assays (EMSAs). Purified La was titrated, mixed with 5'  
432 fluorescently-labeled miR-122 and incubated at 30°C. After incubation, complexes were  
433 separated by electrophoresis and detected by in-gel fluorescence (Figure 7d). As negative  
434 and positive controls for La interaction we used 22 nt RNAs comprised of alternating  
435 purines or poly-uridine, respectively (Figure 7 – figure supplement 2a and 2b). The  
436 measured  $K_d$  for La:miR-122 was 4.8 nM (Figure 7e). Notably, this measurement indicates  
437 that the affinity of miR-122 for La is greater than the affinity previously reported for Ago2

438 and miRNAs, with  $K_d$ s from 10-80 nM (Tan et al. 2009). We therefore conclude that the  
439 La:miR-122 complex displays high affinity and specific interaction *in vitro*.

440

#### 441 **Finding the miR-122 motif responsible for its packaging**

442 Lastly, we explored the miR-122 motif responsible for its association with La and  
443 packaging into EVs in the cell-free reaction. La has been shown to bind to UUU sequences at  
444 the 3' end of PolIII transcripts (Stefano 1984) and miR-122 contains a UUUG at that  
445 terminus (Figure 8a). We designed a variant of miR-122 where A residues replaced the 3'U  
446 bases and found that this specie is poorly packaged into vesicles in the cell-free reaction  
447 (3% efficient incorporation vs. 15% for WT) and displays a greatly reduced (~100-fold)  
448 affinity for La in the EMSA analysis (WT  $K_d$  4.8 nM vs 3'mut  $K_d$  538 nM) (Figure 8a, b and c  
449 and figure supplement 1a). We conclude that the UUU sequence at the 3' end of miR-122 is  
450 necessary for a high affinity interaction with La, which may correlate to the requirement  
451 for these residues in the packaging of miR-122 into vesicles in the cell-free reaction.

452

453 To identify possible motifs beyond the literature-based UUU candidate, we also  
454 performed a multiple expectation maximization (EM) for motif elicitation (MEME) analysis  
455 for 49 HD EV miRNAs. We considered miRNAs that were at least 10-fold enriched, as  
456 detected by profiling and sequencing, as well as those unique miRNAs in the HD sub-  
457 population that were detected by sequencing. This approach identified "UGGA" as an EV-  
458 enriched miRNA motif. This motif was present in 13 (26%) of the 49 analyzed miRNAs,  
459 including the 5' sequence of miR-122 (Fig. 8a), and it was by far the most overrepresented  
460 motif detected by this analysis. The UGGA sequence appeared to be EV specific, as it did not

461 emerge when similar analyses were performed with exclusively cellular miRNAs (miRNAs  
462 detected in cellular lysates but absent in the EV samples). We then manually assessed the  
463 pool of exclusively cellular miRNAs for this motif where it appeared in 5 out of 97 analyzed  
464 miRNAs (5%). A variant of this 5' sequence motif impaired miR-122 incorporation in the *in*  
465 *vitro* packaging reaction (Figure 8b) and decreased the affinity ~10-fold for La compared to  
466 WT (Figure 8c and figure supplement 1b). Thus, we conclude that a bipartite, or possibly  
467 even more complex motif directs recognition of miR-122 by La and consequently results in  
468 its selective sorting into EVs and secretion from MDA-MB-231 cells.

469

## 470 **DISCUSSION**

### 471 **Different molecular mechanisms of miRNA sorting**

472 Here we document the separation of two EV populations, likely of different sub-  
473 cellular origin, which appear to employ different molecular mechanisms of miRNA sorting  
474 (Figure 9). We found that EVs with a density ranging from 1.08-1.10 g/ml (LD) may  
475 originate in the plasma membrane, whereas the EVs with a density ranging from 1.13 to  
476 1.15 g/ml (HD) are more characteristic of exosomes, originating in the endocytic pathway.  
477 Some miRNAs are non-selectively sorted into both EV sub-populations, as shown by their  
478 similar relative abundances in the cellular lysate and both EV sub-populations (Figure 3d).  
479 We observed a slight enrichment for non-selectively sorted miRNAs in the HD sub-  
480 population (Figure 3a) and a minor depletion of non-selectively sorted miRNAs in the LD  
481 sub-population (Figure 3b).

482

483 Non-selective sorting may correlate to the fraction of miRNAs unbound to the RISC  
484 complex. Association of miRNAs with the RISC complex inside cells varies greatly: >1,800-  
485 fold for different miRNAs present in the same cell line (Flores et al. 2014). As a result,  
486 some miRNAs may exist in the cytoplasm as mostly RISC-free species. Our data show that  
487 Ago2 and Dicer are not present in EVs derived from MDA-MB-231 cells (figure 4 - figure  
488 supplement 2). Thus, we suggest that the non-selectively sorted miRNAs may represent the  
489 cytosolic pool of RISC-free miRNAs, not actively engaged in silencing, and their presence in  
490 EVs is the result of a passive mechanism of sorting.

491  
492 P-bodies have been shown to be closely associated with MVBs (Gibbings et al. 2009)  
493 and the levels of target mRNAs can influence the levels of miRNA association with the RISC  
494 complex (Flores et al. 2014), as well as miRNA secretion as detected in the high-speed  
495 pellet fraction sedimented from conditioned media (Squadrito et al. 2014). Thus, miRNAs  
496 released from P bodies and freed from the RISC complex may be proximal to endosomes  
497 engaged in the production of HD vesicles and distant from the site of LD vesicle biogenesis,  
498 thus resulting in a slight enrichment and slight depletion of these miRNAs in the HD and LD  
499 vesicles, respectively.

500  
501 We focused the bulk of our investigation on a set of miRNAs selectively packaged in  
502 the HD sub-population. These selectively sorted miRNAs may belong to the pool of pre-  
503 existing RISC-free miRNAs, or may be displaced from the RISC complex prior to or  
504 concomitant with sorting into HD vesicles. Importantly, we found that this mechanism of  
505 selective miRNA sorting is specific for the HD sub-population. We speculate that the sorting

506 machinery required to enrich certain miRNAs in exosomes is specific for MVBs, and it is  
507 absent at the site of origin of the LD vesicles. However, enveloped viruses that bud from  
508 the cell surface clearly do sort their RNA genomes in a selective manner (D'Souza and  
509 Summers 2005; Swanson and Malim 2006) and the same may be true of other RNA  
510 biotypes in the LD sub-population, especially in other cell lines. We previously showed that  
511 tRNAs with an unknown post-transcriptional modification in the D-loop are highly  
512 enriched in EVs in comparison to the cells from the same culture (Shurtleff et al. 2017).  
513 Similarly, we detected apparently similarly modified tRNA species in both EV sub-  
514 populations secreted from MDA-MB-231 cells (Figure 3-supplemental 2e). The machinery  
515 for the active sorting of the modified tRNA may be shared for both EV sub-populations.

516

517       It is widely suggested that EV miRNAs play a role in intercellular communication  
518 (Fong et al. 2015; Zhou et al. 2014; Tominaga et al. 2015; Rana, Malinowska, and Zoller  
519 2013; Hsu et al. 2017). Thus, purifying EV sub-populations, with differential miRNA  
520 content, is critical in order to accurately assess their role in intercellular communication.  
521 One study purified different EVs based on their buoyant densities and showed that the LD  
522 sub-population triggered the differential expression of 257 genes in recipient cells,  
523 whereas the HD sub-population caused the differential expression of 1,116 genes (Willms  
524 et al. 2016). Although this study did not determine if any gene expression differences were  
525 the result of miRNA transfer, the effect could be partially explained by the distinct miRNA  
526 composition of the two EV sub-populations. Further studies using purified EV sub-  
527 populations are needed to understand the physiological consequence of selective vs. non-

528 selective sorting mechanisms. Additionally, it needs to be determined if the effects are  
529 directly attributable to miRNAs or some other constituents of the two EV populations.

530

### 531 **The role of La in selective sorting of miRNAs**

532 Here we show *in vitro* and *in vivo* evidence for the requirement of La for packaging  
533 of miR-122 into HD EVs derived from MDA-MB-231 cells. The La protein is an abundant  
534 RBP that is upregulated in some cancers (Sommer, Rossa, et al. 2011; Trotta et al. 2003; Al-  
535 Ejeh, Darby, and Brown 2007; Sommer, Dittmann, et al. 2011). Its presence in the  
536 cytoplasm has been linked to the translational regulation of mRNAs bearing IRES (Petz,  
537 Them, Huber, Beug, et al. 2012; Petz, Them, Huber, and Mikulits 2012), as well as 5'TOP  
538 mRNAs (Intine et al. 2003; Cardinali et al. 2003; Crosio et al. 2000). Interestingly, it was  
539 previously reported that 5'TOP mRNAs are enriched in EVs derived from HEK293T cells in  
540 comparison to their relative cellular levels (Shurtleff et al. 2017), although we have not yet  
541 evaluated the abundance of 5'TOP mRNAs in EVs isolated from MDA-MB-231 cells.

542

543 Little is known about how cytoplasmic RNA binding proteins, such as La, along with  
544 bound RNA molecules are targeted and recognized for secretion. The phosphorylation  
545 status of La has been suggested to be important for its intracellular localization (Intine et  
546 al. 2003). In addition, sumoylation of La has been shown to be important for La-dependent  
547 mRNA transport in neurons (van Niekerk et al. 2007) and sumoylation of another RNA-  
548 binding protein in EVs (hnRNPA2B1) has been shown to be important for export  
549 (Villarroya-Beltri et al. 2013). Post-translational modifications such as phosphorylation,



550 ubiquitylation and sumoylation may serve to direct RNPs to the ESCRT machinery and thus  
551 into membrane buds that are internalized into MVBs.

552

553         The La protein binds to and stabilizes poly-uridine stretches of PolIII transcripts  
554 that mature in the nucleus (Wolin and Cedervall 2002). Likewise in the cytoplasm, La may  
555 serve a similar function in the stabilization of polyuridine tracks in 5'TOP mRNAs (Intine et  
556 al. 2003). Here we show that La directly binds to, and promotes the vesicle packaging of  
557 miR-122 in a cell-free reaction. We obtained evidence that a 3' poly-uridine sequence of  
558 miR-122 is required for this interaction. This role of La may extend to miRNAs secreted by  
559 other cell lines. B cell-derived EVs are enriched for 3' uridylylated miRNA isoforms in  
560 comparison to their intracellular counterparts (Koppers-Lalic et al. 2014), and La has been  
561 detected by mass spectrometry in the high-speed pellet fraction from B cell conditioned  
562 medium (Meckes et al. 2013).

563

564         In addition to the known poly (U) binding site, sequence motif analysis of the most  
565 highly enriched miRNAs in the HD vesicles isolated from MDA-MB-231 conditioned  
566 medium identified a second, previously unreported motif required for La:miR-122 high  
567 affinity interaction and sorting into EVs in our cell-free reaction. A 5' UGGA sequence  
568 resembles the motif shown to be required for miRNA sorting into hepatocyte EVs,  
569 dependent on the SYNCRIP protein (Santangelo et al. 2016). However, we did not detect  
570 SYNCRIP in our mass spectrometry analysis for RBP partners responsible for miR-122  
571 sorting *in vitro* (Figure 4d). Thus, it is possible hepatocytes and breast cancer epithelial  
572 cells differ in their mechanisms of miRNA sorting. The presence of both motifs, UUU and

573 UGGA, in miR-122 may allow for an exceptionally high affinity interaction with La. The  
574 measured  $K_d$  for the La:miR-122 complex is 4.8 nM, indicating tighter binding than that  
575 reported for Ago2 to miRNAs using a similar assay (Tan et al. 2009). This high affinity  
576 interaction may explain how selected miRNAs are sequestered into exosomes away from  
577 the RISC complex.

578

579 As we have shown with La, other RBPs (YBX1 (Shurtleff et al. 2016), hnRNPa2b1  
580 (Villarroya-Beltri et al. 2013) and SYNCRIP (Santangelo et al. 2016)) are involved in the  
581 selective sorting and secretion of miRNAs in different cell lines. Conceivably, this process  
582 could be organized and controlled in a cell-specific manner by the assembly of RNA  
583 granules including other more abundant RNAs such as tRNA, Y-RNA and vault RNA  
584 (Shurtleff et al., 2017). In this respect, we find that most of the La protein in the cytoplasm  
585 is localized in punctate structures, some of which closely associate with the late endosomal  
586 marker Rab7 (Figure 7 – figure supplement 1a and 1c). It will be instructive to examine  
587 the cytoplasmic co-localization of La with the other RBPs implicated in miRNA secretion in  
588 EVs.

589

### 590 **Significance of selective miRNA sorting into EVs in cancer**

591 Intercellular communication mediated by miRNAs is a subject of considerable  
592 interest, but in most cases, it remains unproven. Many studies using cancer cells suggest  
593 EV-mediated miRNA transfer to recipient cells (Fong et al. 2015; Zhou et al. 2014;  
594 Tominaga et al. 2015; Rana, Malinowska, and Zoller 2013; Hsu et al. 2017), possibly to  
595 promote metastasis. In the context of breast cancer for example, EV resident miR-122 has

596 been suggested to promote metastasis through reprogramming glucose metabolism in the  
597 resident cells of the premetastatic niche (Fong et al. 2015). In another example, EV-  
598 associated miR-105 may promote invasiveness in metastatic breast cancer by disruption of  
599 tight junctions, thus promoting vascular permeability and tumor cell invasion (Zhou et al.  
600 2014). For EV miRNAs to be functionally transferred to recipient cells, fusion of the EV  
601 membrane with a recipient membrane (either plasma membrane or endosomal  
602 membrane) must precede the presentation of an exogenous miRNA to the target cell  
603 cytoplasm. We find that the highly-selected miRNAs in exosomes are not bound to Ago2.  
604 Thus, the usual function of a miRNA would require loading from the EV interior to a  
605 cytoplasmic RISC complex. Unfortunately, nothing is known about the cytoplasmic  
606 presentation of miRNAs derived from EVs.

607

608         Alternatively, tumor cell invasiveness may depend on the selective secretion and  
609 disposal of tumor suppressor miRNAs. Such a suggestion has been made for miR-23b  
610 (Ostenfeld et al. 2014) and miR-100 (Cha et al. 2015), which are secreted at high efficiency  
611 by cancer cells. These two mechanisms, intercellular communication and disposal, are not  
612 mutually exclusive. It is possible that EVs containing detrimental miRNAs have been  
613 repurposed to serve as shuttles for intercellular communication, as has been suggested for  
614 the secretion of miR-142 (Dickman et al. 2017). Of relevance to the work we report here,  
615 miR-122 has been suggested as a tumor suppressor with cells developing greater  
616 invasiveness on loss of this miRNA (Coulouarn et al. 2009; Wang, Wang, and Yang 2012).  
617 Nonetheless, the importance of EV resident miR-122 as a molecule to convey a message to  
618 promote metastasis has also been suggested (Fong et al. 2015).

619

620           A bigger challenge in the field of cancer and EV biology is that claims for a role of  
621 EV-associated miRNAs are based on crude preparations of sedimentable particles or co-  
622 culture experiments. Here we show that Ago2 is secreted to the extracellular space as a  
623 RNP, not vesicle-associated, that co-isolates with EVs in the high-speed pellet. Thus, clear  
624 demonstration that the implicated miRNAs in cancer development are enclosed within a  
625 membrane vesicle is still missing. Studies purifying, characterizing, understanding the  
626 cellular biology behind different EV sub-populations and their functional effects in the  
627 context of cancer will prove important in the future.

628

## 629 **MATERIALS AND METHODS**

630

631 Cell lines, media and general chemicals

632 MDA-MB-231 cells were cultured in DMEM with 10% FBS (Thermo Fisher Scientific,  
633 Waltham, MA). MDA-MB-231 cells were confirmed by short tandem repeat profiling (STR)  
634 and tested negative for mycoplasma contamination. For EV production, cells were seeded  
635 at ~10% confluency in exosome-depleted medium (System Biosciences, Palo Alto, CA) in  
636 150mm CellBIND tissue culture dishes (Corning, Corning, NY) containing 30ml of growth  
637 medium. EVs were collected when cells reached ~80% confluency (~72h). Unless  
638 otherwise noted, all chemicals were purchased from Sigma Aldrich (St. Louis, MO).

639

640 Extracellular vesicle purification

641 Conditioned medium (720 ml for TGIRT-seq and miRNA profiling and 420 ml for all other

642 experiments) was harvested from 80% confluent MDA-MB-231 cultured cells. All  
643 subsequent manipulations were performed at 4°C. Cells and large debris were removed by  
644 centrifugation in a Sorvall R6+ centrifuge (Thermo Fisher Scientific) at 1,000xg for 15 min  
645 followed by 10,000xg for 15 min in 500 ml vessels using a fixed angle FIBERlite F14-  
646 6X500y rotor (Thermo Fisher Scientific). The supernatant fraction was then centrifuged at  
647 ~100,000xg (28,000 RPM) onto a 60% sucrose cushion in buffer C (10mM HEPES pH 7.4,  
648 0.85% w/v NaCl) for 1.5 h using two SW-28 rotors. The interface over the sucrose cushion  
649 was collected and pooled for an additional ~130,000xg (32,500 RPM) centrifugation over a  
650 60% sucrose cushion in a SW41 rotor for 15 h. The collected interface from the first  
651 sucrose cushion should not exceed a sucrose concentration of 21%, as measured by  
652 refractometry, for the second centrifugation in the SW41 to be successful. Higher  
653 concentrations of sucrose cause the EVs to equilibrate at the ambient buoyant density,  
654 impeding sedimentation. For purification of EV sub-populations based on their distinct  
655 buoyant density, the cushion-sedimented vesicles were collected and mixed with 60%  
656 sucrose to a final volume of 4ml (sucrose final concentration ~40%). Layers of 1.5 ml of  
657 25%, 20%, 15%, 10% and 5% iodixanol (Optiprep) solutions in buffer C were sequentially  
658 overlaid and samples were centrifuged at ~160,000xg (36,000 RPM) for 15 h in a SW41  
659 rotor. Fractions (400ul) from top to bottom were then collected and mixed with Laemmli  
660 buffer for immunoblot analysis or RNA was extracted using a mirVana miRNA isolation kit  
661 (Thermo Fischer Scientific). This method produced a linear density gradient from 1.036 to  
662 1.24 g/ml (figure 1 – figure supplement 1 – source data 1). For detection of Ago2 and Dicer  
663 (Figure 4 - figure supplement 2), vesicles were not sedimented over a 60% sucrose  
664 cushion. Sedimented EVs from the SW28 centrifugation were resuspended in 800ul of 30%

665 iodixanol and layers of 800ul of 25%, 20%, 15%, 10% and 5% iodixanol were layered on  
666 top and centrifuged in a SW55 rotor at ~140,000xg (38,000RPM) for 15 h. Fractions  
667 (200ul) were collected from top to bottom and mixed with Laemmli buffer for  
668 immunoblots analysis.

669 For EV purification in bulk (without discriminating among EV sub-populations), the EVs  
670 collected after the first SW41 centrifugation were mixed with 60% sucrose to a final  
671 volume of 9 ml (sucrose concentration ~50%). Layers of 1.5 ml of 40% and 10% sucrose  
672 were overlaid and the sample was centrifuged at ~160,000xg (36,000 RPM) for 15 h in a  
673 SW41 rotor. Buoyant vesicles spanning from the 40% sucrose region and the 10/40%  
674 interface were collected and mixed with Laemmli buffer or RNA was extracted with a  
675 mirVana miRNA isolation kit. For further processing to improve protein detection, buoyant  
676 vesicles were first diluted in buffer C (10mM HEPES pH 7,4, 0.85% w/v NaCl) to a final  
677 volume of 5 ml and soluble content was released by adding 10% Triton X-100 (TX-100) to a  
678 final concentration of 1%. Samples were then homogenized by the use of a vortex mixer for  
679 1 min, cooled on ice for 10 min and homogenized again for an extra min. To precipitate  
680 proteins, we added 4 volumes of cold acetone (previously stored at -20°C) and the mixture  
681 was incubated at -20°C overnight. Precipitated proteins were collected using a Sorvall RC  
682 6+ centrifuge by centrifugation at 16,000xg (11,600 RPM) for 30 min at 4°C in a FIBERlite  
683 F211-8X50Y rotor (Thermo Fischer Scientific). The pellet fraction was then resuspended in  
684 Laemmli buffer for analysis by immunoblotting.

685 For proteinase K protection assays, the EVs were collected by centrifugation at ~140,000xg  
686 (28,000 RPM) for 1.5 h using two SW-28 rotors. Pellet fractions resuspended in buffer C  
687 were pooled and centrifuged at ~160,000xg (36,000 RPM) in a SW55 rotor for 1 h. The

688 pellet was resuspended in buffer C and split into 3 equal aliquots. One sample was left  
689 untreated, another sample treated with 5ug/ml proteinase K on ice for 20 min, and the last  
690 was mixed with TX-100 to a final concentration of 1% prior to proteinase K treatment.  
691 Proteinase K was inactivated with 5mM phenylmethane sulfonyl fluoride (PMSF) (5 min on  
692 ice) and samples were then mixed with Laemmli buffer for immunoblot analysis.

693

694 Mass spectrometry analysis of EV sub-populations

695 EV sub-populations purified from the iodixanol gradient (as described above) were diluted  
696 with buffer C to a final volume of 30ml. The diluted samples were then centrifuged at  
697 ~100,000xg (28,000RPM) in a SW28 rotor for 1.5 h. Pellet samples were resuspended in  
698 Laemmli buffer without bromophenol blue and electrophoresed in a 4-20% acrylamide  
699 Tris-Glycine gradient gel (Life Technologies) for ~3 min. The bulk of proteins were stained  
700 with Coomassie and the stained band was excised from the gel with a new razor blade.  
701 Samples were submitted to the Vincent J. Coates Proteomics/Mass Spectroscopy laboratory  
702 at UC Berkeley for in-gel tryptic digestion of proteins followed by liquid chromatography  
703 and mass spectrometry analysis according to their standards.

704 For sub-cellular localization analysis of the detected proteins, the list of proteins detected  
705 by mass spectrometry was analyzed first using the GoTermFinder developed at the Lewis-  
706 Sigler Institute at Princeton (Boyle et al. 2004) followed by REVIGO analysis (Supek et al.  
707 2011) to obtain the scatterplots of sub-cellular localization along with their organelle  
708 association.

709

710 Nanoparticle tracking analysis

711 Extracellular vesicles purified on linear iodixanol gradients were diluted 1:100 with PBS  
712 filtered with a 0.02um filter (Whatman GmbH, Dassel, Germany). The mixture was drawn  
713 into a 1 ml syringe and inserted into a Nanosight LM10 instrument (Malvern, UK). Particles  
714 were tracked for 60 s using Nanosight nanoparticle tracking analysis software. Each sample  
715 was analyzed 5 times and the counts were averaged.

716

#### 717 Immunoblots

718 Exosomes were prepared by mixing sedimented vesicles with 1X Laemmli buffer, or 1X  
719 Laemmli buffer without DTT when detection of CD63 was performed using the BD  
720 Bioscience antibody (below). Cell lysates were prepared by adding lysis buffer (10 mM  
721 Tris-HCl, pH 7.4, 100 mM NaCl, 0.1% sodium dodecyl sulfate, 0.5% sodium deoxycholate,  
722 1% Triton X-100, 10% glycerol) to cell pellets. Protein was quantified using a BCA Protein  
723 Assay Kit (Thermo Fischer Scientific), and the selected amount was mixed with Laemmli  
724 buffer. Samples were heated at 95°C for 5 min and separated on 4-20% acrylamide Tris-  
725 Glycine gradient gels (Life Technologies). Proteins were transferred to polyvinylidene  
726 difluoride membranes (EMD Millipore, Darmstadt, Germany), blocked with 5% bovine  
727 serum albumin in TBST and incubated overnight with primary antibodies. Blots were then  
728 washed with TBST, incubated with anti-rabbit or anti-mouse secondary antibodies (GE  
729 Healthcare Life Sciences, Pittsburgh, PA) and detected with ECL-2 reagent (Thermo Fisher  
730 Scientific). Primary antibodies used in this study were anti-CD9 #13174S (Cell Signaling  
731 Technology, Danvers, MA), anti-alpha integrin alpha 3 #ab190731 (Abcam, Cambridge,  
732 MA), anti-Mfg-e8 #MAB2767 (R&D systems, Minneapolis, MN), anti-flotillin-2 #610383 (BD  
733 Biosciences, San Jose, CA), anti-TSG101 #GTX70255 (Genetex, Irvine, CA), anti-CD63 #sc-



734 15363 (Santa Cruz Biotechnology, Dallas, TX), anti-CD63 (BD Biosciences), anti-Ago2  
735 #2897 (Cell Signaling Technology), anti-Dicer #sc-30226 (Santa Cruz Biotechnology), anti-  
736 Lupus La #TA500406 (Origene Technologies, Rockville, MD), anti-vinculin #ab129002  
737 (Abcam), anti-Rab27a ab55667 (Abcam), anti-nucleophosmin1 #ab10530 (Abcam), anti-  
738 nucleolin #ab22758 (Abcam), anti-tubulin #ab7291 (Abcam), and anti-Hsc-70 #ab19136  
739 (Abcam).

740

741 Quantitative real-time PCR

742 Cellular and EV RNAs were extracted with a mirVana miRNA isolation kit (Thermo Fischer  
743 Scientific), unless otherwise specified. Taqman miRNA assays for miRNA detection were  
744 purchased from Life Technologies. Assay numbers were: hsa-miR-193b, #002366; hsa-  
745 miR-29b-1, #002165; hsa-miR-486, #001278; hsa-miR-574-3p, #002349; hsa-miR-320a,  
746 #002277; hsa-miR-142-3p, #000464; hsa-miR-126, #000451; hsa-mir-145-5p, #002278;  
747 hsa-mir-122-5p, #002245; hsa-mir-451a, #001141; hsa-mir-182-5, 002334; hsa-miR-429,  
748 #001024; hsa-miR-675, #121124\_mat; hsa-miR-193a-5p, #002281. As there are no well-  
749 accepted endogenous control transcripts for EVs, the relative quantification was  
750 normalized to equal amounts of starting RNA material. RNA was quantified by an Agilent  
751 2100 Bioanalyzer (Agilent Technologies, Santa Clara, CA) according to the manufacturer's  
752 instructions. RNA (1ng) was used for reverse transcription according to the  
753 manufacturer's instructions. Relative quantification was calculated from the expression  $2^{-(Ct_{(control)}-Ct_{(experimental)})}$ .  
754 Taqman qPCR master mix with no amperase UNG was obtained  
755 from Life Technologies and quantitative real-time PCR was performed using an ABI-7900  
756 real-time PCR system (Life Technologies).

757

758 Immunofluorescence

759 MDA-MB-231 cells on 12mm round coverslips (Corning) were fixed by adding 4% EM-  
760 grade formaldehyde (Electron Microscopy Sciences, Hatfield, PA) for 20 min at room  
761 temperature. Subsequently, cells were washed 3 times with PBS and  
762 permeabilized/blocked by adding blocking buffer (0.1% TX-100 in 2 FBS% for validation  
763 experiments, or 0.02% saponin in 2% FBS for superresolution structured illumination  
764 microscopy (SIM)) for 20 min. Cells treated with 0.02% saponin retain intact nuclear  
765 envelopes and endoplasmic reticulum membranes (Sirkis, Aparicio, and Schekman 2017;  
766 Gorur et al. 2017), which allowed us to visualize cytoplasmic La. Cells were then incubated  
767 with 1:100 dilution of anti-La (Origene Technologies, #TA500406) and 1:100 dilution of  
768 anti-Rab7 (Santa Cruz, sc-6563) in blocking buffer for 1.5 h at room temperature,  
769 extensively washed and incubated in secondary antibodies diluted 1:1,000 in blocking  
770 buffer and Alexa Fluor 488 and 647 (Thermo Fischer Scientific), for 1.5 h. Cells were  
771 extensively washed, rinsed briefly in dH<sub>2</sub>O and mounted on slides with ProLong Gold with  
772 DAPI (Thermo Fischer). For validation experiments, WT and La-depleted cells were imaged  
773 keeping all the settings constant in an Axio Observer Z1 (Zeiss, Oberkochen, Germany). For  
774 superresolution microscopy, images were taken with an Elyra P.1 (Zeiss)

775

776 miRNA profiling

777 We used the Discovery Panel from Firefly Service at Abcam to profile 408 miRNAs.  
778 Aliquots of 40 µl of 270pg/µl of RNA (samples included HD, LD and CL) were shipped to the  
779 Abcam service and the profiling was done according to their standards. Samples were

780 normalized to total amount of RNA. The data used for the analysis was raw data with  
781 background subtracted. Only data with more than 0.1 arbitrary units of fluorescence (AUF)  
782 was considered for further analysis.

783

784 RNA extraction and TGIRT-seq library preparation

785 Cellular and EV RNAs were extracted by using a mirVana miRNA Isolation Kit. Cellular RNA  
786 was extracted using a modified version of the mirVana protocol, enriching for <200nt  
787 transcripts, in order to reflect EV RNA composition by transcript size. EV RNA was  
788 extracted using the standard miRVana protocol. TGIRT-seq libraries were prepared from 2-  
789 10ng of starting material.

790

791 TGIRT-seq libraries were prepared essentially as described (Qin et al. 2016a), with a  
792 modification in the starting molecule (see below). Reverse transcription reactions  
793 contained purified RNAs, buffer (20 mM Tris-HCl, pH7.5, 450 mM NaCl, 5 mM MgCl<sub>2</sub>), 5 mM  
794 DTT, 100 nM starting molecule (see below) and 1 μM TGIRT-III (Ingex). Reverse  
795 transcription by TGIRT-III is initiated by template switching from a starting molecule  
796 consisting of a DNA primer (5'-GTGACTGGAGTTCAGACGTGTGCTCTTCCGATCTATTAN-3')  
797 encoding the reverse complement of the Illumina Read2 sequencing primer binding site  
798 (R2R) annealed to a complementary RNA oligonucleotide (R2) such that there is a single  
799 nucleotide 3' DNA overhang composed of an equimolar mixture of A, G, C and T. The RNA  
800 oligonucleotide is blocked at its 3' end with C3Sp (IDT) to inhibit template switching to  
801 itself. Reactions were pre-incubated at room temperature for 30 min and then initiated by  
802 addition of 1 mM dNTPs. Reactions were then incubated at 60°C for 15 min and terminated

803 by adding 5 N NaOH to a final concentration of 0.25 N and incubated at 95°C for 3 min to  
804 degrade RNAs and denature protein. The reactions were then cooled to room temperature  
805 and neutralized with 5 N HCl. cDNAs were purified by using a Qiagen MinElute Reaction  
806 Cleanup Kit and then ligated at their 3' ends to a modified DNA oligonucleotide (5'Phos-  
807 CCTGTTATCCCTAGATCGTCGGACTGTAGAACTCTGAACGTGTAC-3'-C3Sp) encoding the  
808 reverse complement of the Illumina Read1 primer binding site (R1R) using Thermo Stable  
809 5' AppDNA/RNA Ligase (New England Biolabs). Ligated cDNAs were re-purified with  
810 MinElute Reaction Cleanup Kit and amplified by PCR for 12 cycles using Phusion DNA  
811 polymerase (Thermo Fisher Scientific) with overlapping multiplex and barcode primers  
812 that add sequences necessary for Illumina sequencing. PCR reactions were purified using a  
813 Select-a-size DNA Clean and Concentrator (Zymo) to remove adapter dimers. Libraries  
814 were sequenced on a NextSeq 500 instrument (75-nt, single end reads) at the Genome  
815 Sequencing and Analysis Facility at the University of Texas at Austin.

816

817 RNA sequencing analysis

818 Illumina TruSeq adapters and PCR primer sequences were trimmed from the reads with  
819 cutadapt 1.16 (Martin 2011) (sequencing quality score cut-off at 20) and reads <15-nt after  
820 trimming were discarded. Reads were then mapped using HISAT2 v2.0.2 (Kim, Langmead,  
821 and Salzberg 2015) with default settings to the human genome reference sequence  
822 (Ensembl GRCh38 Release 76) combined with additional contigs for 5S and 45S rRNA  
823 genes and the *E. coli* genome sequence (Genebank: NC\_000913) (denoted Pass 1). The  
824 additional contigs for the 5S and 45S rRNA genes included the 2.2-kb 5S rRNA repeats from  
825 the 5S rRNA cluster on chromosome 1 (1q42, GeneBank: X12811) and the 43-kb 45S rRNA

826 repeats that contained 5.8S, 18S and 28S rRNAs from clusters on chromosomes  
827 13,14,15,21, and 22 (GeneBank: U13369). Unmapped reads from Pass 1 were re-mapped to  
828 Ensembl GRCh38 Release 76 by Bowtie 2 v2.2.6 (Langmead and Salzberg 2012) with local  
829 alignment to improve the mapping rate for reads containing post-transcriptionally added 5'  
830 or 3' nucleotides (e.g., CCA and poly(U)), short untrimmed adapter sequences, or non-  
831 templated nucleotides added to the 3' end of the cDNAs by the TGIRT enzyme (denoted  
832 Pass 2). The mapped reads from Passes 1 and 2 were combined using Samtools 1.8 (Li et al.  
833 2009) and intersected with gene annotations (Ensembl GRCh38 Release 76) supplemented  
834 with the RNY5 gene and its 10 pseudogene sequences, which were not annotated in this  
835 release, to generate the counts for individual features. Coverage of each feature was  
836 calculated by Bedtools (Quinlan and Hall 2010). To avoid mis-mapping reads with  
837 embedded sncRNAs, reads were first intersected with sncRNA annotations and the  
838 remaining reads were then intersected with the annotations for protein-coding genes,  
839 lincRNAs, antisense, and other lncRNAs. To further improve the mapping rate for tRNAs  
840 and rRNAs, we combined reads mapped to tRNAs or rRNAs in the initial alignments and re-  
841 mapped them to tRNA reference sequences (Genomic tRNA Database, and UCSC genome  
842 browser website) or rRNA reference sequences (GeneBank: X12811 and U13369) using  
843 Bowtie 2 local alignment. Because similar or identical tRNAs with the same anticodon may  
844 be multiply mapped to different tRNA loci by Bowtie 2, mapped tRNA reads were combined  
845 according to their anticodon (N = 48) prior to calculating the tRNA distributions.

846 For miRNA analysis, sequences were mapped to miRbase using miRdeep2. Reads were  
847 normalized by dividing the numbers or reads per miRNA to the total number of miRNA  
848 reads in each sample and then this value was multiplied by one million (reads per million

849 miRNA mapped reads – RPM).

850

851 CRISPR/Cas9 genome editing

852 A pX330-based plasmid expressing Venus fluorescent protein (Shurtleff et al. 2016) was  
853 used to clone the gRNAs targeting Rab27a and Rab35. Two CRIPSR guide RNAs targeting  
854 each gene were selected using the CRISPR design tool (Hsu et al. 2013). For Rab27a, gRNAs  
855 targeting exon 4 and exon 5 were selected. For Rab35 both gRNAs targeted exon 1. Both  
856 gRNAs targeting each gene were cloned simultaneously in the pX330-Venus plasmid  
857 according to the PrecisionX Multiplex gRNA Kit instructions (SBI). MDA-MB-231 cells at  
858 25% confluency were transfected for 48h, and then, they were trypsinized and sorted for  
859 single Venus-positive cells in a 96 well plate using a BD Influx cell sorter. Wells containing  
860 clones were allowed to expand (30 clones for Rab27a and 25 for Rab35) and knockouts for  
861 each gene were confirmed by immunoblots.

862

863 CRISPR interference

864 MDA-MB-231 cells expressing dCas9-KRAB, as in (Gilbert et al. 2013), were generated  
865 using lentivirus. A modified version of the transfer plasmid, as in (Gilbert et al. 2013),  
866 UCOE- EF1 $\alpha$ -dCas9-BFP-KRAB, was kindly provided by Jonathan Weissman (UCSF). Cells  
867 were bulk sorted for BFP signal 3 d post transduction and selected cells were expanded by  
868 growth for a few generations, and then frozen and stored as parental cells (these cells are  
869 referred to as WT throughout the manuscript). Sequences for gRNAs targeting the  
870 promoter of the genes of interest were extracted from (Horlbeck et al. 2016). gRNAs were  
871 cloned in plasmid pu6-sgRNA EF1Alpha-puro-T2A-BFP (Gilbert et al. 2014), plasmid

872 #60955 obtained from Addgene, following the cloning protocol as in (Gilbert et al. 2014).  
873 The 3 top gRNAs from the V.2 library (Horlbeck et al. 2016) were chosen per gene of  
874 interest. Lentiviruses with the gRNAs targeting the genes of interest were used to transduce  
875 the parental cells. Three days post transduction cells were selected with 2 $\mu$ g/ml puromycin  
876 for 3 d. Post puromycin selection, cells were collected for up to 3 generations (~ 72 h) for  
877 best levels of protein depletion. More doubling times showed reduced protein depletion.

878

879 In vitro packaging reactions

880

881 Membrane and cytosol preparation

882 Fractionation of cells and membranes was done as in (Shurtleff et al. 2016) with some  
883 modifications as indicated. MDA-MB-231 cells were harvested at ~80% confluency by  
884 adding cold PBS and physically removing the cells by the use of a cell scraper. Cells were  
885 then centrifuged at 1,000 $\times$ g for 10min at 4°C and cell pellets were frozen at -80°C until use.  
886 Cells were thawed and resuspended in 2 volumes of HB buffer (20mM HEPES pH 7.4,  
887 250mM sorbitol) containing protease inhibitor cocktail I (1mM 4 aminobenzamide  
888 dihydrochloride, 1 mg/ml antipain dihydrochloride, 1 mg/ml aprotinin, 1 mg/ml leupeptin,  
889 1 mg/ml chymostatin, 1 mM phenylmethylsulfonyl fluoride, 50 mM N-tosyl-L-phenylalanine  
890 chloromethyl ketone and 1 mg/ml pepstatin). Cells were passed 21-25 times through a 22  
891 gauge needle until >80% of cells were lysed as assessed by microscopy and trypan blue  
892 staining. All steps from hereon were done on ice and 4°C, unless otherwise specified. The  
893 homogenized cells were centrifuged at 1,500 $\times$ g for 20 min and the supernatant fraction  
894 was subsequently centrifuged at 15,000 $\times$ g for 15 min to collect donor membranes using a

895 FA-45-30-11 rotor and an Eppendorf 5430 centrifuge (Eppendorf, Hamburg, Germany).  
896 The supernatant fraction was centrifuged again at ~150,000xg (49,000 RPM) in a TLA-55  
897 rotor and Optima Max XP ultracentrifuge (Beckman Coulter) to generate the cytosol  
898 fraction (5-6 mg/ml). The 15,000xg membrane fraction (pellet) was resuspended in 1  
899 volume of HB buffer and an equal volume of 0.8M LiCl. Donor membranes were then  
900 centrifuged again as before and the pellet fraction was resuspended in 1 volume of original  
901 starting material HB buffer.

902

### 903 *In vitro* miRNA packaging reaction

904 The *in vitro* packaging reaction was performed as described in (Shurtleff et al. 2016).  
905 Briefly, miR-122-5p and the variant versions were purchased from Integrated DNA  
906 Technologies (IDT, Coralville, IA). Membranes and cytosols were prepared from MDA-MB-  
907 231 cells as described above, with the exception of assays using YBX1 KO cells, in which  
908 case HEK293T cells WT and YBX1 KO were used as described (Shurtleff et al. 2016).  
909 Complete miRNA packaging assays consist of 10ul membranes, 16ul cytosol (the cytosolic  
910 concentration was 5.5 mg/ml, unless otherwise specified), 4ul 10X ATP regeneration  
911 system (400mM creatine phosphate, 2mg/ml creatine phosphokinase, 10mM AT, 20mM  
912 HEPES pH 7.2, 250mM sorbitol, 150mM KOAc, 5mM MgOAc), 8ul 5X incorporation buffer  
913 (400 mM KCl, 100 mM CaCl<sub>2</sub>, 60 mM HEPES-NaOH, pH 7.4, 6 mM, MgOAc), 1ul of 10nM  
914 synthetic single stranded RNA and 1ul RNAsin (Promega, Madison, WI). For rescue  
915 experiments with purified La, ~0.1ug of total purified La was added per reaction. Reactions  
916 were incubated for 20 min at 30°C, then 1ul of RNase If (50,000units/ml) (NEB, Ipswich,  
917 MA) and 4ul of 10X NEB buffer 3 (NEB) was added to the reactions and incubated for an



918 extra 20 min at 30°C. Following incubation, RNA was extracted using Direct-Zol (Zymo  
919 Research, Irvine, CA) according to manufacturer's instructions and miRNA was quantified  
920 using TaqMan miRNA assays as described above. The output was represented as a  
921 percentage of protection by comparing the level of miRNA left in the RNase-treated  
922 samples relative to an ice control which was not RNase-treated. The ice, no RNase control  
923 was set to 100%.

924

925 Streptavidin pull-down of miR-122 and interacting proteins

926 The *in vitro* packaging reaction was performed as described above with a modified version  
927 of miR-122, 3' biotinylated miR-122 (IDT), which was used to mediate its capture with  
928 streptavidin beads. Post-incubation with RNase If, the reactions were heated to 65°C for 15  
929 min to inactivate RNase If and then mixed with 10% TX-100 for a final concentration of 1%  
930 and kept on ice for 30 min. Dynabeads Myone Streptavidin T1 (Thermo Fischer Scientific)  
931 were washed three times with 1X incorporation buffer and then added to the reactions. The  
932 reaction was incubated for 1.5 h at 4°C with constant rotation. Beads were washed with 1X  
933 incorporation buffer 5 times and bound proteins were eluted with 1X Laemmli buffer  
934 without bromophenol blue. Proteins were electrophoresed in a 4-20% acrylamide Tris-  
935 Glycine gradient gel (Life Technologies) for ~3 min. The bulk of proteins were stained with  
936 Coomassie and the stained band was excised from the gel using a fresh razor blade.  
937 Samples were submitted to the Vincent J. Coates Proteomics/Mass Spectroscopy laboratory  
938 at UC Berkeley for in-gel tryptic digestion of proteins followed by liquid chromatography  
939 and mass spectrometry analysis according to their standards. The list of detected proteins  
940 was then curated for RNA binding proteins, excluding any structural ribosomal protein.

941  
942 Protein purification  
943 Human La protein was expressed in Sf9 cells as a N-terminal 6X His tagged version.  
944 pLJM60-Ssb (Thoreen et al. 2012), plasmid #38241 obtained from Addgene, served as the  
945 La sequence backbone. La was cloned in the pFastBac vector from the Bac-to-Bac  
946 Baculovirus expression System (Thermo Fischer Scientific) according to the manufacturer's  
947 specifications. The generation of bacmids and the production of baculoviruses was  
948 performed as indicated by the manufacturer. For La purification, 1 liter of Sf9 cells was  
949 infected with baculovirus. Cells expressing La were harvested 2 d post infection by  
950 centrifugation at 1,000xg for 15min at 4°C using a Sorvall RC 6+ centrifuge with a  
951 FIBERLite F10-6X500Y rotor. Cellular pellet fractions were stored at -20°C until use. The  
952 cellular pellet was thawed and resuspended in 40ml of lysis buffer (20mM HEPES, pH8,  
953 0.1mM EGTA, 500mM NaCl, 5mM DTT, 10mM imidazole, 10mM MgCl<sub>2</sub>, 250mM sorbitol, 5%  
954 glycerol, 1mM PMSF, and protease inhibitor cocktail 1mM 4-aminobenzamidine  
955 dihydrochloride, 1 µg/ml antipain dihydrochloride, 1 µg/ml aprotinin, 1 µg/ml leupeptin, 1  
956 µg/ml chymostatin, 1 mM phenylmethylsulfonyl fluoride, 50 µM N-tosyl-L-phenylalanine  
957 chloromethyl ketone and 1 µg/ml pepstatin)), homogenized and then sonicated. Post-lysis,  
958 the material was centrifuged at ~40,000xg (20,000 RPM) using a FIBERlite F211-8X50Y  
959 rotor for 20 min at 4°C. The supernatant fraction was centrifuged again at ~42,500xg for 1  
960 h using a Ti70 rotor. In preparation for the sample, 2 ml of Ni-NTA resin beads (Thermo  
961 Fischer Scientific) were washed twice with lysis buffer. The supernatant then was mixed  
962 with Ni-NTA beads and the suspension incubated with constant rotation at 4°C for 2.5 h.  
963 Beads were washed 3 times with washing buffer (recipe for washing buffer was the same

964 as lysis buffer (above) but with 50mM imidazole instead of 10mM imidazole). Proteins  
965 were eluted with 4ml of elution buffer (elution buffer similar recipe to lysis buffer, but the  
966 imidazole concentration was 250mM). Eluted proteins were applied to a Sephadex G25  
967 column (Thermo Fischer Scientific). Buffer was exchanged to Buffer B (10mM Tris, pH 7,4,  
968 150mM NaCl, 3mM MgCl<sub>2</sub>, 5% glycerol). Purified fractions were pooled, flash-frozen in  
969 liquid nitrogen and stored at -80 C.

970

971 Electrophoretic mobility shift assays

972 In-gel fluorescence was detected in order to assess the free and protein-bound RNA.  
973 Fluorescently labeled (5') RNAs (IRD800CWN) were ordered from Integrated DNA  
974 Technologies (IDT, Coralville, IA). EMSAS were performed following (Rio 2014), with some  
975 modifications. In brief, 1nM of fluorescently labeled RNA was mixed and incubated with  
976 increasing amounts of purified La, ranging from 250pM – 2uM. Buffer E was used in this  
977 incubation (25mM Tris pH8, 100mM KCl, 1.5mM MgCl<sub>2</sub>, 0.2mM EGTA, 0.05% Nonidet P-40,  
978 50ug/ml heparin). Reactions were incubated at 30°C for 30 min and then chilled on ice for  
979 10 min and mixed with 6X loading buffer (60mM KCl, 10mM Tris pH 7,6, 50% glycerol,  
980 0.03% (w/v) xylene cyanol). Polyacrylamide gels (6%), acrylamide:bisacrylamide (29:1)  
981 (Bio-Rad, Hercules, CA), made with Tris-glycine buffer were prerun for 30min at 200V in  
982 the cold room. Samples were resolved in the prerun gels at 200V for 50 min in a 4°C cold  
983 room. Fluorescence was detected by using an Odyssey CLx Imaging System (LI-COR  
984 Biosciences, Lincoln, NE). The software of the Odyssey CLx Imaging System was used to  
985 obtain quantification of fluorescence. To calculate K<sub>d</sub>s, we fit Hill equations with quantified  
986 data points. Fraction bound was calculated as a function of exhaustion of free-miRNA.

987

988 Immunoprecipitation of La and La-RNA complexes

989 Approximately 40 million cells were harvested as described in the section “Membrane and  
990 Cytosol preparation.” Cells were homogenized in 2 volumes of HB buffer and physically  
991 disrupted as previously described. Non-lysed cells and nuclei were centrifuged at 1,500xg  
992 for 20min. The supernatant fraction was used as source of cytoplasmic La for  
993 immunoprecipitation and was divided into 3 equal parts: input, La-IP, beads only.  
994 Dynabead Protein G (Thermo Fischer Scientific) was washed 3 times in polysome lysis  
995 buffer (Peritz et al. 2006). A 5X polysome lysis buffer was made and mixed with 1,500xg  
996 post-nuclear supernatant to a final 1X concentration. Anti-La (Origene Technologies,  
997 #TA500406) was added to the post nuclear supernatant to a final concentration of  
998 2ug/500ul and the mixture was incubated with rotation overnight at 4°C. Dynabeads  
999 Protein G (Thermo Fischer) beads were added to the mixture and this mixture was  
1000 incubated for an additional 3 h at 4°C with constant rotation. Beads were washed 5 times  
1001 with 1X polysome buffer and the content was divided for protein or RNA analysis. Beads  
1002 for protein analysis were incubated with Laemmli buffer and heated at 95°C for 10 min and  
1003 beads for RNA analysis were exposed to TRI reagent (Zymo Research) for RNA extraction  
1004 using Direct-Zol (Zymo Research) as indicated by the manufacturer. Protein and miRNAs  
1005 were analyzed by immunoblots and TaqMan miRNA qPCR analysis, respectively.

1006

1007 Motif analysis

1008 For motif analysis, we used the MEME Suite 5.0.2 (Bailey and Elkan 1994). MiRNAs  
1009 detected uniquely in the HD sub-population by TGIRT-seq were pooled together with

1010 miRNAs that were found to be enriched by at least 10-fold (HD/cellular lysate) through  
1011 TGIRT-seq and Firefly profiling. A total of 49 miRNAs met those requirements and were  
1012 used for further analysis. A 0 and 1 Markov background model was used to find 3-5  
1013 nucleotide motifs. The total mature *Homo sapiens* miRNAs from miRBase were used as  
1014 background.

1015

## 1016 **FIGURE LEGENDS**

1017

1018 Figure 1. Two biochemically distinct EV sub-populations are released by MDA-MB-231  
1019 cells. a) Schematic showing the two-step purification methodology. Differential  
1020 ultracentrifugation was followed by buoyant density flotation in a linear iodixanol gradient  
1021 (Figure 1 – figure supplement 1). b) Immunoblot across the iodixanol gradient for classical  
1022 EV markers. The two discrete sub-populations are indicated. CD63, a glycosylated protein,  
1023 runs as a smear. The CD63 signal is indicated by a bracket. c) Nanoparticle tracking  
1024 analysis showing the size distribution of the HD and LD sub-population. The high-speed  
1025 pellet is also shown. d) Bioanalyzer analysis of the HD and LD RNA. The high-speed pellet  
1026 RNA is also shown.

1027

1028 Figure 1 – figure supplement 1. Linearity of iodixanol density gradient. Calculated iodixanol  
1029 fraction densities collected from the top to bottom of the gradient (fractions 1 to 25)  
1030 as measured by refractometry (figure 1 – figure supplement 1 – source data 1). Fractions  
1031 were collected post 160,000g ultracentrifugation (Figure 1a). In red, fractions

1032 corresponding to the LD sub-population. In blue, fractions corresponding to the HD sub-  
1033 population.

1034

1035 Figure 1 – figure supplement 1 – source data 1. Refraction index and calculated densities of  
1036 the fractions across the gradient (31 fractions in total).

1037

1038 Figure 2. The two biochemically distinct EV sub-populations co-fractionate with  
1039 membranes of different sub-cellular origin. a, b) Gene ontology analysis for sub-cellular  
1040 localization of membrane proteins that coincide with HD and LD proteins detected by mass  
1041 spectrometry. Size of circles correlates to log<sub>10</sub> p-value. c) Analysis of WT, CRISPR-Cas9  
1042 Rab27a KO and CRISPR-Cas9 Rab35 KO by immunoblot. Rab27a, Rab35 and vinculin are  
1043 shown. d) Immunoblots for CD63 and CD9 in EVs secreted by WT, Rab27a KO cells and  
1044 Rab35 KO cells. The amounts of loaded EVs were normalized by total cellular number.

1045

1046 Figure 2 - source data 1. List of proteins detected by mass spectrometry in both EV sub-  
1047 populations.

1048

1049 Figure 3. MicroRNA profiling of high buoyant density and low buoyant density EV sub-  
1050 populations. a, b) Scatterplots showing the relative abundance (as arbitrary units of  
1051 fluorescence (AUF)) for miRNAs detected in HD and LD sub-populations relative to cellular  
1052 levels, as detected by Firefly profiling and normalized per ng of total RNA. In blue, HD  
1053 miRNAs that were selected for further validation by RT-qPCR. Circled miRNAs in LD  
1054 represent those also found to be enriched in the HD-subpopulation. c, d) Log<sub>2</sub> fold change

1055 for top HD and LD candidate miRNAs in HD or LD relative to cells (HD/CL or LD/CL,  
1056 respectively) and HD relative to LD or vice versa (HD/LD or LD/HD, respectively). MiRNA  
1057 species were quantified by RT-qPCR and normalized per ng of total RNA. e) Scatterplots  
1058 showing relative abundance of miRNAs (AUF) detected in HD and LD sub-populations  
1059 normalized per ng of total RNA, as detected by Firefly profiling. f) RNase protection of  
1060 highly enriched HD miRNAs quantified by qPCR. Purified EVs were treated with or without  
1061 RNase I and or Triton X-100. CL: cellular lysate. Dashed red lines in a, b and e, represent  
1062 10-fold differences.

1063  
1064 Figure 3 – figure supplement 1. MiR-122 and miR-451 are highly enriched in the HD sub-  
1065 population. Fold difference HD/CL or LD/CL for miR-451a and miR-122. Data extracted  
1066 from Firefly profiling. CL: cellular lysate.

1067  
1068 Figure 3 – figure supplement 2. TGIRT-sequencing of high buoyant density and low  
1069 buoyant density EV sub-populations. a, b) Scatterplots showing the relative abundance (as  
1070 reads per million (RPM)) for miRNAs detected in HD and LD sub-populations relative to CL  
1071 levels. Normalized per total number of miRNA reads. In blue, HD miRNAs that were  
1072 selected for further validation by qPCR. In red, LD miRNAs selected for further validation  
1073 by qPCR. Circled miRNAs in LD represent those also found to be enriched in the HD-  
1074 subpopulation c) Venn Diagram showing the total number of HD and LD uniquely found  
1075 miRNAs (miRNAs with non-detectable signal in cellular lysates) detected by TGIRT-seq. d)  
1076 Bar graph showing the distribution of all small non-coding RNA transcripts found in HD  
1077 and LD sub-populations. e) tRNA start site distribution showing the majority of tRNA reads

1078 start at position 16, previously described as the site of an EV-specific D-loop modification  
1079 (Shurtleff et al. 2017). The putative D-loop modification is present at relatively same levels  
1080 in both the HD and LD sub-populations. CL: cellular lysate. Dashed red lines in a and b  
1081 represent 10-fold differences.

1082

1083 Figure 4. MiR-122 packaging is recapitulated in a cell-free reaction. a) Schematic depicting  
1084 the *in vitro* packaging reaction. Image reproduced from the original manuscript developing  
1085 the cell-free reconstitution assay (Shurtleff et al. 2016). b) Quantification of the *in vitro*  
1086 packaging reaction of miR-122. Reactions with or without membranes (15,000xg pellet),  
1087 cytosol (150,000xg supernatant) prepared from MDA-MB-231 cells and incubated at 30°C  
1088 or 4°C are shown. Data plotted are from 3 independent experiments, each with triplicate  
1089 qPCR reactions; error bars represent standard deviation from independent samples. c)  
1090 Quantification of the *in vitro* packaging of miR-122 and miR-223. Cytosols from WT or  
1091 YBX1 KO HEK293T cells were used. Incubations at 30°C or 4°C are shown. Data plotted are  
1092 from 2 independent experiments, each with triplicate qPCR reactions; error bars represent  
1093 standard deviation from independent samples. d) List of RNA binding proteins pulled  
1094 down with biotinylated miR-122 after a modified *in vitro* packaging reaction was  
1095 performed (see materials and methods).

1096

1097 Figure 4 – figure supplement 1. MiR-122 accumulates in conditioned media (CM) over time.  
1098 Quantification of total number of miR-122 molecules in CM. CM was incubated with or  
1099 without MDA-MB-231 cells for a period of 48 h. Samples were collected at the indicated



1100 time points. Cell debris and apoptotic bodies were removed by low and medium speed  
1101 centrifugation (as in steps 1-2 shown in Fig. 1a).

1102

1103 Figure 4 – figure supplement 2. Ago2 and Dicer are not EV-associated in MB-MDA-231 cells.  
1104 Immunoblot for EV markers across the linear iodanol gradient as depicted in Fig 1a. The  
1105 presence of Ago2 and Dicer was also tested.

1106

1107 Figure 4 – figure supplement 3. CRISPRi efficiently depletes the RNA binding protein  
1108 candidates. a) Analysis of RBP depletion by immunoblots. Immunoblots for La, NPM1 and  
1109 vinculin are shown. b) Relative quantification of miR-122 *in vitro* packaging. Cytosols from  
1110 WT, La or NPM1-depleted backgrounds were tested in the reactions (cytosols from (a)  
1111 were used). Two cytosolic protein concentrations were tested: 3 and 6mg/ml.

1112

1113 Figure 5. Sorting of miR-122 into EVs *in vitro* requires La. a) Quantification of miR-122 *in*  
1114 *vitro* packaging. WT and La-depleted cytosols were titrated from 1.5 to 6mg/ml. Data  
1115 plotted are from 2 independent experiments, each with triplicate qPCR reactions; error  
1116 bars represent standard deviation from independent samples. b) Heterologously expressed  
1117 La rescues miR-122 *in vitro* packaging. Quantification of miR-122 *in vitro* packaging is  
1118 shown. Cytosols from WT or La-depleted cells with or without complementation using  
1119 purified La were used. Reactions without cytosol, with or without membranes and with  
1120 added purified La are also shown. Data plotted are from 3 independent experiments, each  
1121 with triplicate qPCR reactions; error bars represent standard deviation from independent  
1122 samples. c) Immunoblots showing the levels of endogenous or heterologously expressed

1123 added La used in the *in vitro* reactions as in (b) are shown. d) Immunoblots for La following  
1124 miR-122 *in vitro* packaging performed as for Fig 3d according to the conditions indicated.

1125  
1126 Figure 5 – figure supplement 1. Purification of heterologously expressed La. Coomassie  
1127 staining of purified La fractions. Fractions shown were collected post gel filtration on  
1128 Sephadex G25 columns.

1129  
1130 Figure 6. MiR-122 sorting into EVs requires La *in vivo*. a) Log<sub>2</sub> fold change for intracellular  
1131 levels of miRNAs of interest post-depletion of the shown RBPs by CRISPRi. MiR-122 and  
1132 miR-142 were used as representatives of selectively packaged miRNAs. MiR-574 and miR-  
1133 320a were used as representatives of non-selectively packaged miRNAs. Data quantified by  
1134 RT-qPCR, normalized per ng of total RNA. b) Log<sub>2</sub> fold change of intracellular and secreted  
1135 levels of miRNAs of interest quantified by RT-qPCR. EVs were purified from WT and La-  
1136 depleted cells. Cellular lysates were isolated at the moment of EV collection. MiR-320a was  
1137 used as a control for non-selectively packaged miRNAs. Data plotted are from 3  
1138 independent experiments (biological replicates) for miR-122 and miR-142 and from 2  
1139 independent experiments (biological replicates) for miR-320a; each with triplicate qPCR  
1140 reactions, error bars represent standard deviation from independent samples. c) Schematic  
1141 representation of the flotation assay and acetone precipitation as in (d). The high-speed  
1142 pellet of conditioned medium was floated in a step sucrose gradient (input) and the soluble  
1143 content was released by the addition of TX-100 and then concentrated by acetone  
1144 precipitation (acetone precipitated). d) EV samples post-flotation and acetone  
1145 precipitation/concentration were tested. Immunoblots for flotillin-2 and La are shown.

1146 Acetone precipitation captures mostly soluble proteins (Feist and Hummon 2015), thus  
1147 flotillin-2 is only detectable in the floated sample, prior to acetone precipitation, whereas  
1148 La detection improves post precipitation/concentration. e) Proteinase K protection assays  
1149 in high-speed pellet fractions. Samples were treated with or without proteinase K and or  
1150 Triton X-100. Immunoblots for flotillin-2, La and Dicer are shown.

1151

1152 Figure 7: La interacts with miR-122 *in vitro* and *in vivo*. a) Schematic representing  
1153 immunoprecipitation of endogenous La shown in (b) and (c). b) Immunoblot for La post-La  
1154 IP. c) Quantification of the La immunoblot post-La IP. The relative levels, as percentage of  
1155 input, of miR-122 and miR-182 co-IP with La are also shown. MiR-182, a non-selectively  
1156 sorted miRNA, served as a negative control for La binding. Data plotted are from 2  
1157 independent experiments (biological replicates), for qPCR data each with triplicate qPCR  
1158 reactions; error bars represent standard deviation from independent samples. d) EMSA  
1159 assays using 5' fluorescently labeled miR-122. Purified La was titrated from 250pM to 2uM.  
1160 In gel fluorescence was detected. e) Quantification of (d) showing the calculated  $K_d$ .  
1161 Fraction bound was quantified as a function of exhaustion of free miRNA.

1162

1163 Figure 7 - figure supplement 1. Detection of nuclear and cytoplasmic La by  
1164 immunofluorescence. a) Immunofluorescence for endogenous La was performed. WT and  
1165 La-depleted cells were fixed and permeabilized with 0.1% Triton X-100. La and DAPI  
1166 staining are shown. b) Cells with arrows in (a) are shown side by side to confirm antibody  
1167 specificity. c) La associates with Rab7-positive vesicles. Structured illumination microscopy

1168 (SIM) was used to achieve higher resolution. Cells were fixed, permeabilized with 0.02%  
1169 saponin, and antibodies against La and Rab7 were used.

1170

1171 Figure 7- figure supplement 2. Controls for La specificity during EMSA. a) 22nt RNA  
1172 oligonucleotide consisting of alternating purines was incubated with different  
1173 concentrations of purified La. Negative control for binding. b) 22nt poly-uridine  
1174 oligonucleotide was incubated with different concentrations of purified La as a positive  
1175 control for binding.

1176

1177 Figure 8. A bipartite motif in miR-122 is required for its packaging and interaction with La  
1178 *in vitro*. a) The sequences of miR-122 WT and mutated versions are shown. b)  
1179 Quantification of *in vitro* packaging of miR-122 WT and mutated versions. Data plotted are  
1180 from 3 independent experiments, each with triplicate qPCR reactions; error bars represent  
1181 standard deviation from independent samples. c) Binding affinity curves (as calculated  
1182 from EMSAs) for miR-122 and the mutated versions are shown. Fraction bound was  
1183 quantified as a function of exhaustion of free miRNA.

1184

1185 Figure 8 – figure supplement 1. EMSA for miR-122 mutated versions. a) miR-122 3'  
1186 mutated oligonucleotide incubated with increasing amounts of La. b) miR-122 5' mutated  
1187 oligonucleotide incubated with increasing amounts of La.

1188

1189 Figure 9: Diagram representing the current model of miRNA sorting into extracellular  
1190 vesicles derived from MDA-MB-231 cells. HD vesicles have their origin in the endocytic

1191 pathway, representing the classical exosomes. We propose a selective mechanism of  
1192 miRNA sorting occurring at the site of HD vesicle biogenesis where La, along with bound  
1193 miR-122 (which interaction is mediated by at least two RNA motifs), is targeted for capture  
1194 into a bud invaginating into the interior of an endosome. LD vesicles may originate at the  
1195 plasma membrane, representing shedding vesicles. There may be no selective miRNA  
1196 sorting occurring at the site of LD vesicle biogenesis. Non-selective miRNA sorting occurs in  
1197 both the HD and LD sub-populations. MVB: multivesicular body, PM: plasma membrane.

1198

### 1199 **Acknowledgements**

1200

1201 We thank Kathleen Collins, Arash Komeili and Donald Rio for advice. We also thank  
1202 Kathleen Collins and Daniel Sirkis for reading and editing the manuscript. We would also  
1203 like to thank the staff at the UC Berkeley shared facilities, the DNA sequencing facility, the  
1204 Vincent J Coates Proteomics Facility, the Flow Cytometry Facility, the Cell Culture Facility  
1205 and the Genomic Sequencing and Analysis Facility at UT Austin. Cartoons were created  
1206 with Biorender (Toronto, Ontario, Canada).

1207

### 1208 **Competing interests**

1209

1210 Thermostable group II intron reverse transcriptase (TGIRT) enzymes and methods for  
1211 their use are the subject of patents and patent applications that have been licensed by the  
1212 University of Texas and East Tennessee State University to InGex, LLC. A.M.L., some former  
1213 and present members of the A.M.L. laboratory, and the University of Texas are minority

1214 equity holders in InGex, LLC and receive royalty payments from the sale of TGIRT enzymes  
1215 and kits and from the sublicensing of intellectual property to other companies.

1216

## 1217 REFERENCES

1218

- 1219 Admyre, C., S. M. Johansson, K. R. Qazi, J. J. Filen, R. Lahesmaa, M. Norman, E. P. Neve, A.  
1220 Scheynius, and S. Gabrielsson. 2007. 'Exosomes with immune modulatory features  
1221 are present in human breast milk', *J Immunol*, 179: 1969-78.
- 1222 Al-Ejeh, F., J. M. Darby, and M. P. Brown. 2007. 'The La autoantigen is a malignancy-  
1223 associated cell death target that is induced by DNA-damaging drugs', *Clin Cancer Res*,  
1224 13: 5509s-18s.
- 1225 Baglio, S. R., M. A. van Eijndhoven, D. Koppers-Lalic, J. Berenguer, S. M. Lougheed, S. Gibbs,  
1226 N. Leveille, R. N. Rinkel, E. S. Hopmans, S. Swaminathan, S. A. Verkuijlen, G. L.  
1227 Scheffer, F. J. van Kuppeveld, T. D. de Gruijl, I. E. Bultink, E. S. Jordanova, M.  
1228 Hackenberg, S. R. Piersma, J. C. Knol, A. E. Voskuyl, T. Wurdinger, C. R. Jimenez, J. M.  
1229 Middeldorp, and D. M. Pegtel. 2016. 'Sensing of latent EBV infection through  
1230 exosomal transfer of 5'pppRNA', *Proc Natl Acad Sci U S A*, 113: E587-96.
- 1231 Bailey, T. L., and C. Elkan. 1994. 'Fitting a mixture model by expectation maximization to  
1232 discover motifs in biopolymers', *Proc Int Conf Intell Syst Mol Biol*, 2: 28-36.
- 1233 Bartel, D. P. 2004. 'MicroRNAs: genomics, biogenesis, mechanism, and function', *Cell*, 116:  
1234 281-97.
- 1235 Bobrie, A., M. Colombo, S. Krumeich, G. Raposo, and C. Thery. 2012. 'Diverse subpopulations  
1236 of vesicles secreted by different intracellular mechanisms are present in exosome  
1237 preparations obtained by differential ultracentrifugation', *J Extracell Vesicles*, 1.
- 1238 Boyle, E. I., S. Weng, J. Gollub, H. Jin, D. Botstein, J. M. Cherry, and G. Sherlock. 2004.  
1239 'GO::TermFinder--open source software for accessing Gene Ontology information  
1240 and finding significantly enriched Gene Ontology terms associated with a list of  
1241 genes', *Bioinformatics*, 20: 3710-5.
- 1242 Caby, M. P., D. Lankar, C. Vincendeau-Scherrer, G. Raposo, and C. Bonnerot. 2005.  
1243 'Exosomal-like vesicles are present in human blood plasma', *Int Immunol*, 17: 879-  
1244 87.
- 1245 Cardinali, B., C. Carissimi, P. Gravina, and P. Pierandrei-Amaldi. 2003. 'La protein is  
1246 associated with terminal oligopyrimidine mRNAs in actively translating polysomes',  
1247 *J Biol Chem*, 278: 35145-51.
- 1248 Cha, D. J., J. L. Franklin, Y. Dou, Q. Liu, J. N. Higginbotham, M. Demory Beckler, A. M. Weaver,  
1249 K. Vickers, N. Prasad, S. Levy, B. Zhang, R. J. Coffey, and J. G. Patton. 2015. 'KRAS-  
1250 dependent sorting of miRNA to exosomes', *Elife*, 4: e07197.
- 1251 Cocucci, E., G. Racchetti, and J. Meldolesi. 2009. 'Shedding microvesicles: artefacts no more',  
1252 *Trends Cell Biol*, 19: 43-51.

- 1253 Colombo, M., G. Raposo, and C. Thery. 2014. 'Biogenesis, secretion, and intercellular  
1254 interactions of exosomes and other extracellular vesicles', *Annu Rev Cell Dev Biol*, 30:  
1255 255-89.
- 1256 Coulouarn, C., V. M. Factor, J. B. Andersen, M. E. Durkin, and S. S. Thorgeirsson. 2009. 'Loss  
1257 of miR-122 expression in liver cancer correlates with suppression of the hepatic  
1258 phenotype and gain of metastatic properties', *Oncogene*, 28: 3526-36.
- 1259 Crosio, C., P. P. Boyl, F. Loreni, P. Pierandrei-Amaldi, and F. Amaldi. 2000. 'La protein has a  
1260 positive effect on the translation of TOP mRNAs in vivo', *Nucleic Acids Res*, 28: 2927-  
1261 34.
- 1262 D'Souza, V., and M. F. Summers. 2005. 'How retroviruses select their genomes', *Nat Rev*  
1263 *Microbiol*, 3: 643-55.
- 1264 Demory Beckler, M., J. N. Higginbotham, J. L. Franklin, A. J. Ham, P. J. Halvey, I. E. Imasuen, C.  
1265 Whitwell, M. Li, D. C. Liebler, and R. J. Coffey. 2013. 'Proteomic analysis of exosomes  
1266 from mutant KRAS colon cancer cells identifies intercellular transfer of mutant  
1267 KRAS', *Mol Cell Proteomics*, 12: 343-55.
- 1268 Dickman, C. T., J. Lawson, J. Jabalee, S. A. MacLellan, N. E. LePard, K. L. Bennewith, and C.  
1269 Garnis. 2017. 'Selective extracellular vesicle exclusion of miR-142-3p by oral cancer  
1270 cells promotes both internal and extracellular malignant phenotypes', *Oncotarget*, 8:  
1271 15252-66.
- 1272 Feist, P., and A. B. Hummon. 2015. 'Proteomic challenges: sample preparation techniques  
1273 for microgram-quantity protein analysis from biological samples', *Int J Mol Sci*, 16:  
1274 3537-63.
- 1275 Flores, O., E. M. Kennedy, R. L. Skalsky, and B. R. Cullen. 2014. 'Differential RISC association  
1276 of endogenous human microRNAs predicts their inhibitory potential', *Nucleic Acids*  
1277 *Res*, 42: 4629-39.
- 1278 Fong, M. Y., W. Zhou, L. Liu, A. Y. Alontaga, M. Chandra, J. Ashby, A. Chow, S. T. O'Connor, S.  
1279 Li, A. R. Chin, G. Somlo, M. Palomares, Z. Li, J. R. Tremblay, A. Tsuyada, G. Sun, M. A.  
1280 Reid, X. Wu, P. Swiderski, X. Ren, Y. Shi, M. Kong, W. Zhong, Y. Chen, and S. E. Wang.  
1281 2015. 'Breast-cancer-secreted miR-122 reprograms glucose metabolism in  
1282 premetastatic niche to promote metastasis', *Nat Cell Biol*, 17: 183-94.
- 1283 Gibbins, D. J., C. Ciaudo, M. Erhardt, and O. Voinnet. 2009. 'Multivesicular bodies associate  
1284 with components of miRNA effector complexes and modulate miRNA activity', *Nat*  
1285 *Cell Biol*, 11: 1143-9.
- 1286 Gilbert, L. A., M. A. Horlbeck, B. Adamson, J. E. Villalta, Y. Chen, E. H. Whitehead, C.  
1287 Guimaraes, B. Panning, H. L. Ploegh, M. C. Bassik, L. S. Qi, M. Kampmann, and J. S.  
1288 Weissman. 2014. 'Genome-Scale CRISPR-Mediated Control of Gene Repression and  
1289 Activation', *Cell*, 159: 647-61.
- 1290 Gilbert, L. A., M. H. Larson, L. Morsut, Z. Liu, G. A. Brar, S. E. Torres, N. Stern-Ginossar, O.  
1291 Brandman, E. H. Whitehead, J. A. Doudna, W. A. Lim, J. S. Weissman, and L. S. Qi.  
1292 2013. 'CRISPR-mediated modular RNA-guided regulation of transcription in  
1293 eukaryotes', *Cell*, 154: 442-51.
- 1294 Gorur, A., L. Yuan, S. J. Kenny, S. Baba, K. Xu, and R. Schekman. 2017. 'COPII-coated  
1295 membranes function as transport carriers of intracellular procollagen I', *J Cell Biol*,  
1296 216: 1745-59.
- 1297 Harding, C., J. Heuser, and P. Stahl. 1983. 'Receptor-mediated endocytosis of transferrin and  
1298 recycling of the transferrin receptor in rat reticulocytes', *J Cell Biol*, 97: 329-39.

- 1299 Horlbeck, M. A., L. A. Gilbert, J. E. Villalta, B. Adamson, R. A. Pak, Y. Chen, A. P. Fields, C. Y.  
1300 Park, J. E. Corn, M. Kampmann, and J. S. Weissman. 2016. 'Compact and highly active  
1301 next-generation libraries for CRISPR-mediated gene repression and activation', *Elife*,  
1302 5.
- 1303 Hsu, C., Y. Morohashi, S. Yoshimura, N. Manrique-Hoyos, S. Jung, M. A. Lauterbach, M.  
1304 Bakhti, M. Gronborg, W. Mobius, J. Rhee, F. A. Barr, and M. Simons. 2010. 'Regulation  
1305 of exosome secretion by Rab35 and its GTPase-activating proteins TBC1D10A-C', *J*  
1306 *Cell Biol*, 189: 223-32.
- 1307 Hsu, P. D., D. A. Scott, J. A. Weinstein, F. A. Ran, S. Konermann, V. Agarwala, Y. Li, E. J. Fine, X.  
1308 Wu, O. Shalem, T. J. Cradick, L. A. Marraffini, G. Bao, and F. Zhang. 2013. 'DNA  
1309 targeting specificity of RNA-guided Cas9 nucleases', *Nat Biotechnol*, 31: 827-32.
- 1310 Hsu, Y. L., J. Y. Hung, W. A. Chang, Y. S. Lin, Y. C. Pan, P. H. Tsai, C. Y. Wu, and P. L. Kuo. 2017.  
1311 'Hypoxic lung cancer-secreted exosomal miR-23a increased angiogenesis and  
1312 vascular permeability by targeting prolyl hydroxylase and tight junction protein ZO-  
1313 1', *Oncogene*, 36: 4929-42.
- 1314 Intine, R. V., S. A. Tenenbaum, A. L. Sakulich, J. D. Keene, and R. J. Maraia. 2003. 'Differential  
1315 phosphorylation and subcellular localization of La RNPs associated with precursor  
1316 tRNAs and translation-related mRNAs', *Mol Cell*, 12: 1301-7.
- 1317 Kim, D., B. Langmead, and S. L. Salzberg. 2015. 'HISAT: a fast spliced aligner with low  
1318 memory requirements', *Nat Methods*, 12: 357-60.
- 1319 Koppers-Lalic, D., M. Hackenberg, I. V. Bijnsdorp, M. A. J. van Eijndhoven, P. Sadek, D. Sie, N.  
1320 Zini, J. M. Middeldorp, B. Ylstra, R. X. de Menezes, T. Wurdinger, G. A. Meijer, and D.  
1321 M. Pegtel. 2014. 'Nontemplated nucleotide additions distinguish the small RNA  
1322 composition in cells from exosomes', *Cell Rep*, 8: 1649-58.
- 1323 Kowal, J., G. Arras, M. Colombo, M. Jouve, J. P. Morath, B. Primdal-Bengtson, F. Dingli, D.  
1324 Loew, M. Tkach, and C. Thery. 2016. 'Proteomic comparison defines novel markers  
1325 to characterize heterogeneous populations of extracellular vesicle subtypes', *Proc*  
1326 *Natl Acad Sci U S A*, 113: E968-77.
- 1327 Langmead, B., and S. L. Salzberg. 2012. 'Fast gapped-read alignment with Bowtie 2', *Nat*  
1328 *Methods*, 9: 357-9.
- 1329 Li, H., B. Handsaker, A. Wysoker, T. Fennell, J. Ruan, N. Homer, G. Marth, G. Abecasis, R.  
1330 Durbin, and Subgroup Genome Project Data Processing. 2009. 'The Sequence  
1331 Alignment/Map format and SAMtools', *Bioinformatics*, 25: 2078-9.
- 1332 Liang, B., P. Peng, S. Chen, L. Li, M. Zhang, D. Cao, J. Yang, H. Li, T. Gui, X. Li, and K. Shen.  
1333 2013. 'Characterization and proteomic analysis of ovarian cancer-derived  
1334 exosomes', *J Proteomics*, 80: 171-82.
- 1335 Martin, Marcel. 2011. 'Cutadapt removes adapter sequences from high-throughput  
1336 sequencing reads', 2011, 17: 3.
- 1337 Meckes, D. G., Jr., H. P. Gunawardena, R. M. Dekroon, P. R. Heaton, R. H. Edwards, S. Ozgur, J.  
1338 D. Griffith, B. Damania, and N. Raab-Traub. 2013. 'Modulation of B-cell exosome  
1339 proteins by gamma herpesvirus infection', *Proc Natl Acad Sci U S A*, 110: E2925-33.
- 1340 Mittelbrunn, M., C. Gutierrez-Vazquez, C. Villarroya-Beltri, S. Gonzalez, F. Sanchez-Cabo, M.  
1341 A. Gonzalez, A. Bernad, and F. Sanchez-Madrid. 2011. 'Unidirectional transfer of  
1342 microRNA-loaded exosomes from T cells to antigen-presenting cells', *Nat Commun*,  
1343 2: 282.



- 1344 Mohr, S., E. Ghanem, W. Smith, D. Sheeter, Y. Qin, O. King, D. Polioudakis, V. R. Iyer, S.  
1345 Hunicke-Smith, S. Swamy, S. Kuersten, and A. M. Lambowitz. 2013. 'Thermostable  
1346 group II intron reverse transcriptase fusion proteins and their use in cDNA  
1347 synthesis and next-generation RNA sequencing', *RNA*, 19: 958-70.
- 1348 Montecalvo, A., A. T. Larregina, W. J. Shufesky, D. B. Stolz, M. L. Sullivan, J. M. Karlsson, C. J.  
1349 Baty, G. A. Gibson, G. Erdos, Z. Wang, J. Milosevic, O. A. Tkacheva, S. J. Divito, R.  
1350 Jordan, J. Lyons-Weiler, S. C. Watkins, and A. E. Morelli. 2012. 'Mechanism of transfer  
1351 of functional microRNAs between mouse dendritic cells via exosomes', *Blood*, 119:  
1352 756-66.
- 1353 Mukherjee, K., B. Ghoshal, S. Ghosh, Y. Chakrabarty, S. Shwetha, S. Das, and S. N.  
1354 Bhattacharyya. 2016. 'Reversible HuR-microRNA binding controls extracellular  
1355 export of miR-122 and augments stress response', *EMBO Rep*, 17: 1184-203.
- 1356 Ostenfeld, M. S., D. K. Jeppesen, J. R. Laurberg, A. T. Boysen, J. B. Bramsen, B. Primdahl-  
1357 Bengtson, A. Hendrix, P. Lamy, F. Dagnaes-Hansen, M. H. Rasmussen, K. H. Bui, N.  
1358 Fristrup, E. I. Christensen, I. Nordentoft, J. P. Morth, J. B. Jensen, J. S. Pedersen, M.  
1359 Beck, D. Theodorescu, M. Borre, K. A. Howard, L. Dyrskjot, and T. F. Orntoft. 2014.  
1360 'Cellular disposal of miR23b by RAB27-dependent exosome release is linked to  
1361 acquisition of metastatic properties', *Cancer Res*, 74: 5758-71.
- 1362 Ostrowski, M., N. B. Carmo, S. Krumeich, I. Fanget, G. Raposo, A. Savina, C. F. Moita, K.  
1363 Schauer, A. N. Hume, R. P. Freitas, B. Goud, P. Benaroch, N. Hacohen, M. Fukuda, C.  
1364 Desnos, M. C. Seabra, F. Darchen, S. Amigorena, L. F. Moita, and C. Thery. 2010.  
1365 'Rab27a and Rab27b control different steps of the exosome secretion pathway', *Nat*  
1366 *Cell Biol*, 12: 19-30; sup pp 1-13.
- 1367 Pan, B. T., K. Teng, C. Wu, M. Adam, and R. M. Johnstone. 1985. 'Electron microscopic  
1368 evidence for externalization of the transferrin receptor in vesicular form in sheep  
1369 reticulocytes', *J Cell Biol*, 101: 942-8.
- 1370 Pegtel, D. M., K. Cosmopoulos, D. A. Thorley-Lawson, M. A. van Eijndhoven, E. S. Hopmans, J.  
1371 L. Lindenberg, T. D. de Gruijl, T. Wurdinger, and J. M. Middeldorp. 2010. 'Functional  
1372 delivery of viral miRNAs via exosomes', *Proc Natl Acad Sci U S A*, 107: 6328-33.
- 1373 Peinado, H., H. Zhang, I. R. Matei, B. Costa-Silva, A. Hoshino, G. Rodrigues, B. Psaila, R. N.  
1374 Kaplan, J. F. Bromberg, Y. Kang, M. J. Bissell, T. R. Cox, A. J. Giaccia, J. T. Erler, S.  
1375 Hiratsuka, C. M. Ghajar, and D. Lyden. 2017. 'Pre-metastatic niches: organ-specific  
1376 homes for metastases', *Nat Rev Cancer*, 17: 302-17.
- 1377 Peritz, T., F. Zeng, T. J. Kannanayakal, K. Kilk, E. Eiriksdottir, U. Langel, and J. Eberwine.  
1378 2006. 'Immunoprecipitation of mRNA-protein complexes', *Nat Protoc*, 1: 577-80.
- 1379 Petz, M., N. C. Them, H. Huber, and W. Mikulits. 2012. 'PDGF enhances IRES-mediated  
1380 translation of Laminin B1 by cytoplasmic accumulation of La during epithelial to  
1381 mesenchymal transition', *Nucleic Acids Res*, 40: 9738-49.
- 1382 Petz, M., N. Them, H. Huber, H. Beug, and W. Mikulits. 2012. 'La enhances IRES-mediated  
1383 translation of laminin B1 during malignant epithelial to mesenchymal transition',  
1384 *Nucleic Acids Res*, 40: 290-302.
- 1385 Pisitkun, T., R. F. Shen, and M. A. Knepper. 2004. 'Identification and proteomic profiling of  
1386 exosomes in human urine', *Proc Natl Acad Sci U S A*, 101: 13368-73.
- 1387 Qin, Y., J. Yao, D. C. Wu, R. M. Nottingham, S. Mohr, S. Hunicke-Smith, and A. M. Lambowitz.  
1388 2016a. 'High-throughput sequencing of human plasma RNA by using thermostable

- 1389 group II intron reverse transcriptases', *RNA*, 22: 111-28. doi:  
1390 10.1261/rna.054809.115. Epub 2015 Nov 9.
- 1391 ———. 2016b. 'High-throughput sequencing of human plasma RNA by using thermostable  
1392 group II intron reverse transcriptases', *RNA*, 22: 111-28.
- 1393 Quinlan, A. R., and I. M. Hall. 2010. 'BEDTools: a flexible suite of utilities for comparing  
1394 genomic features', *Bioinformatics*, 26: 841-2.
- 1395 Rana, S., K. Malinowska, and M. Zoller. 2013. 'Exosomal tumor microRNA modulates  
1396 premetastatic organ cells', *Neoplasia*, 15: 281-95.
- 1397 Raposo, G., and W. Stoorvogel. 2013. 'Extracellular vesicles: exosomes, microvesicles, and  
1398 friends', *J Cell Biol*, 200: 373-83.
- 1399 Rinke, J., and J. A. Steitz. 1985. 'Association of the lupus antigen La with a subset of U6  
1400 snRNA molecules', *Nucleic Acids Res*, 13: 2617-29.
- 1401 Rio, D. C. 2014. 'Electrophoretic mobility shift assays for RNA-protein complexes', *Cold  
1402 Spring Harb Protoc*, 2014: 435-40.
- 1403 Rodriguez, M., J. Silva, A. Lopez-Alfonso, M. B. Lopez-Muniz, C. Pena, G. Dominguez, J. M.  
1404 Garcia, A. Lopez-Gonzalez, M. Mendez, M. Provencio, V. Garcia, and F. Bonilla. 2014.  
1405 'Different exosome cargo from plasma/bronchoalveolar lavage in non-small-cell  
1406 lung cancer', *Genes Chromosomes Cancer*, 53: 713-24.
- 1407 Santangelo, L., G. Giurato, C. Cicchini, C. Montaldo, C. Mancone, R. Tarallo, C. Battistelli, T.  
1408 Alonzi, A. Weisz, and M. Tripodi. 2016. 'The RNA-Binding Protein SYNCRIP Is a  
1409 Component of the Hepatocyte Exosomal Machinery Controlling MicroRNA Sorting',  
1410 *Cell Rep*, 17: 799-808.
- 1411 Shurtleff, M. J., M. M. Temoche-Diaz, K. V. Karfilis, S. Ri, and R. Schekman. 2016. 'Y-box  
1412 protein 1 is required to sort microRNAs into exosomes in cells and in a cell-free  
1413 reaction', *Elife*, 5.
- 1414 Shurtleff, M. J., J. Yao, Y. Qin, R. M. Nottingham, M. M. Temoche-Diaz, R. Schekman, and A. M.  
1415 Lambowitz. 2017. 'Broad role for YBX1 in defining the small noncoding RNA  
1416 composition of exosomes', *Proc Natl Acad Sci U S A*, 114: E8987-E95.
- 1417 Shurtleff, Matthew J., Morayma M. Temoche-Diaz, and Randy Schekman. 2018.  
1418 'Extracellular Vesicles and Cancer: Caveat Lector', *Annual Review of Cancer Biology*,  
1419 2: 395-411.
- 1420 Sirkis, D. W., R. E. Aparicio, and R. Schekman. 2017. 'Neurodegeneration-associated mutant  
1421 TREM2 proteins abortively cycle between the ER and ER-Golgi intermediate  
1422 compartment', *Mol Biol Cell*, 28: 2723-33.
- 1423 Skottvoll, Froydis Sved, Henriette Engen Berg, Kamilla Bjorseth, Kaja Lund, Norbert Roos,  
1424 Sara Bekhradnia, Bernd Thiede, Hanne Roberg-Larsen, Bo Nystrom, Elsa Lundanes,  
1425 and Steven Ray Wilson. 2018. 'Comparison of ultracentrifugation and a commercial  
1426 kit for isolation of exosomes derived from glioblastoma and breast cancer cell lines',  
1427 *bioRxiv*.
- 1428 Sommer, G., J. Dittmann, J. Kuehnert, K. Reumann, P. E. Schwartz, H. Will, B. L. Coulter, M. T.  
1429 Smith, and T. Heise. 2011. 'The RNA-binding protein La contributes to cell  
1430 proliferation and CCND1 expression', *Oncogene*, 30: 434-44.
- 1431 Sommer, G., C. Rossa, A. C. Chi, B. W. Neville, and T. Heise. 2011. 'Implication of RNA-  
1432 binding protein La in proliferation, migration and invasion of lymph node-  
1433 metastasized hypopharyngeal SCC cells', *PLoS One*, 6: e25402.

- 1434 Squadrito, M. L., C. Baer, F. Burdet, C. Maderna, G. D. Gilfillan, R. Lyle, M. Ibberson, and M. De  
1435 Palma. 2014. 'Endogenous RNAs modulate microRNA sorting to exosomes and  
1436 transfer to acceptor cells', *Cell Rep*, 8: 1432-46.
- 1437 Stefano, J. E. 1984. 'Purified lupus antigen La recognizes an oligouridylate stretch common  
1438 to the 3' termini of RNA polymerase III transcripts', *Cell*, 36: 145-54.
- 1439 Supek, F., M. Bosnjak, N. Skunca, and T. Smuc. 2011. 'REVIGO summarizes and visualizes  
1440 long lists of gene ontology terms', *PLoS One*, 6: e21800.
- 1441 Swanson, C. M., and M. H. Malim. 2006. 'Retrovirus RNA trafficking: from chromatin to  
1442 invasive genomes', *Traffic*, 7: 1440-50.
- 1443 Szczepanski, M. J., M. Szajnik, A. Welsh, T. L. Whiteside, and M. Boyiadzis. 2011. 'Blast-  
1444 derived microvesicles in sera from patients with acute myeloid leukemia suppress  
1445 natural killer cell function via membrane-associated transforming growth factor-  
1446 beta1', *Haematologica*, 96: 1302-9.
- 1447 Tan, G. S., B. G. Garchow, X. Liu, J. Yeung, J. P. th Morris, T. L. Cuellar, M. T. McManus, and M.  
1448 Kiriakidou. 2009. 'Expanded RNA-binding activities of mammalian Argonaute 2',  
1449 *Nucleic Acids Res*, 37: 7533-45.
- 1450 Thoreen, C. C., L. Chantranupong, H. R. Keys, T. Wang, N. S. Gray, and D. M. Sabatini. 2012. 'A  
1451 unifying model for mTORC1-mediated regulation of mRNA translation', *Nature*, 485:  
1452 109-13.
- 1453 Tominaga, N., N. Kosaka, M. Ono, T. Katsuda, Y. Yoshioka, K. Tamura, J. Lotvall, H.  
1454 Nakagama, and T. Ochiya. 2015. 'Brain metastatic cancer cells release microRNA-  
1455 181c-containing extracellular vesicles capable of destructing blood-brain barrier',  
1456 *Nat Commun*, 6: 6716.
- 1457 Tosar, J. P., F. Gambaro, J. Sanguinetti, B. Bonilla, K. W. Witwer, and A. Cayota. 2015.  
1458 'Assessment of small RNA sorting into different extracellular fractions revealed by  
1459 high-throughput sequencing of breast cell lines', *Nucleic Acids Res*, 43: 5601-16.
- 1460 Trotta, R., T. Vignudelli, O. Candini, R. V. Intine, L. Pecorari, C. Guerzoni, G. Santilli, M. W.  
1461 Byrom, S. Goldoni, L. P. Ford, M. A. Caligiuri, R. J. Maraia, D. Perrotti, and B.  
1462 Calabretta. 2003. 'BCR/ABL activates mdm2 mRNA translation via the La antigen',  
1463 *Cancer Cell*, 3: 145-60.
- 1464 Van Deun, J., P. Mestdagh, R. Sormunen, V. Cocquyt, K. Vermaelen, J. Vandesompele, M.  
1465 Bracke, O. De Wever, and A. Hendrix. 2014. 'The impact of disparate isolation  
1466 methods for extracellular vesicles on downstream RNA profiling', *J Extracell Vesicles*,  
1467 3.
- 1468 van Niekerk, E. A., D. E. Willis, J. H. Chang, K. Reumann, T. Heise, and J. L. Twiss. 2007.  
1469 'Sumoylation in axons triggers retrograde transport of the RNA-binding protein La',  
1470 *Proc Natl Acad Sci U S A*, 104: 12913-8.
- 1471 Vella, L. J., R. A. Sharples, V. A. Lawson, C. L. Masters, R. Cappai, and A. F. Hill. 2007.  
1472 'Packaging of prions into exosomes is associated with a novel pathway of PrP  
1473 processing', *J Pathol*, 211: 582-90.
- 1474 Villarroya-Beltri, C., C. Gutierrez-Vazquez, F. Sanchez-Cabo, D. Perez-Hernandez, J. Vazquez,  
1475 N. Martin-Cofreces, D. J. Martinez-Herrera, A. Pascual-Montano, M. Mittelbrunn, and  
1476 F. Sanchez-Madrid. 2013. 'Sumoylated hnRNPA2B1 controls the sorting of miRNAs  
1477 into exosomes through binding to specific motifs', *Nat Commun*, 4: 2980.
- 1478 Wang, B., H. Wang, and Z. Yang. 2012. 'MiR-122 inhibits cell proliferation and  
1479 tumorigenesis of breast cancer by targeting IGF1R', *PLoS One*, 7: e47053.

- 1480 Wei, Z., A. O. Batagov, D. R. Carter, and A. M. Krichevsky. 2016. 'Fetal Bovine Serum RNA  
1481 Interferes with the Cell Culture derived Extracellular RNA', *Sci Rep*, 6: 31175.
- 1482 Willms, E., H. J. Johansson, I. Mager, Y. Lee, K. E. Blomberg, M. Sadik, A. Alaarg, C. I. Smith, J.  
1483 Lehtio, S. El Andaloussi, M. J. Wood, and P. Vader. 2016. 'Cells release  
1484 subpopulations of exosomes with distinct molecular and biological properties', *Sci*  
1485 *Rep*, 6: 22519.
- 1486 Wolin, S. L., and T. Cedervall. 2002. 'The La protein', *Annu Rev Biochem*, 71: 375-403.
- 1487 Wu, X., G. Somlo, Y. Yu, M. R. Palomares, A. X. Li, W. Zhou, A. Chow, Y. Yen, J. J. Rossi, H. Gao,  
1488 J. Wang, Y. C. Yuan, P. Frankel, S. Li, K. T. Ashing-Giwa, G. Sun, Y. Wang, R. Smith, K.  
1489 Robinson, X. Ren, and S. E. Wang. 2012. 'De novo sequencing of circulating miRNAs  
1490 identifies novel markers predicting clinical outcome of locally advanced breast  
1491 cancer', *J Transl Med*, 10: 42.
- 1492 Zhou, W., M. Y. Fong, Y. Min, G. Somlo, L. Liu, M. R. Palomares, Y. Yu, A. Chow, S. T. O'Connor,  
1493 A. R. Chin, Y. Yen, Y. Wang, E. G. Marcusson, P. Chu, J. Wu, X. Wu, A. X. Li, Z. Li, H. Gao,  
1494 X. Ren, M. P. Boldin, P. C. Lin, and S. E. Wang. 2014. 'Cancer-secreted miR-105  
1495 destroys vascular endothelial barriers to promote metastasis', *Cancer Cell*, 25: 501-  
1496 15.  
1497

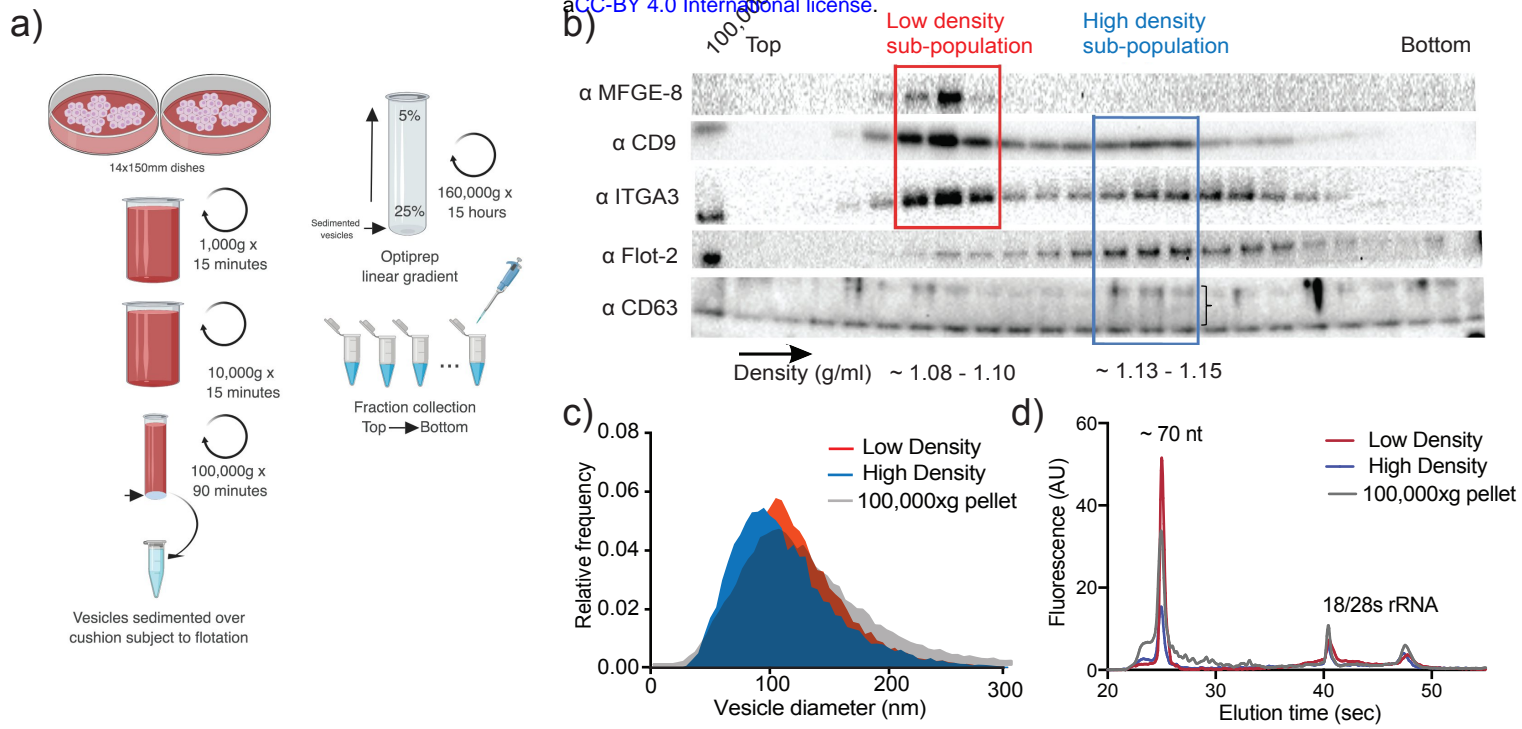

Figure 1. Two biochemically distinct EV sub-populations are released by MDA-MB-231 cells.

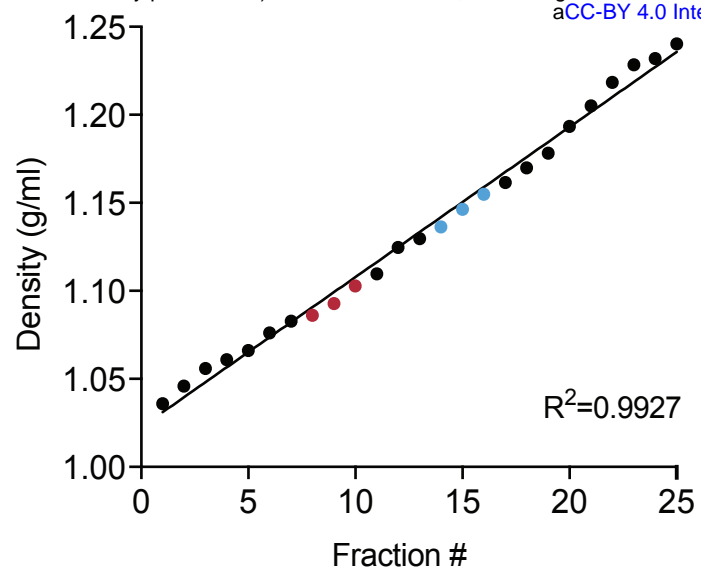

Figure 1 - figure supplement 1. Linearity of iodixanol density gradient.

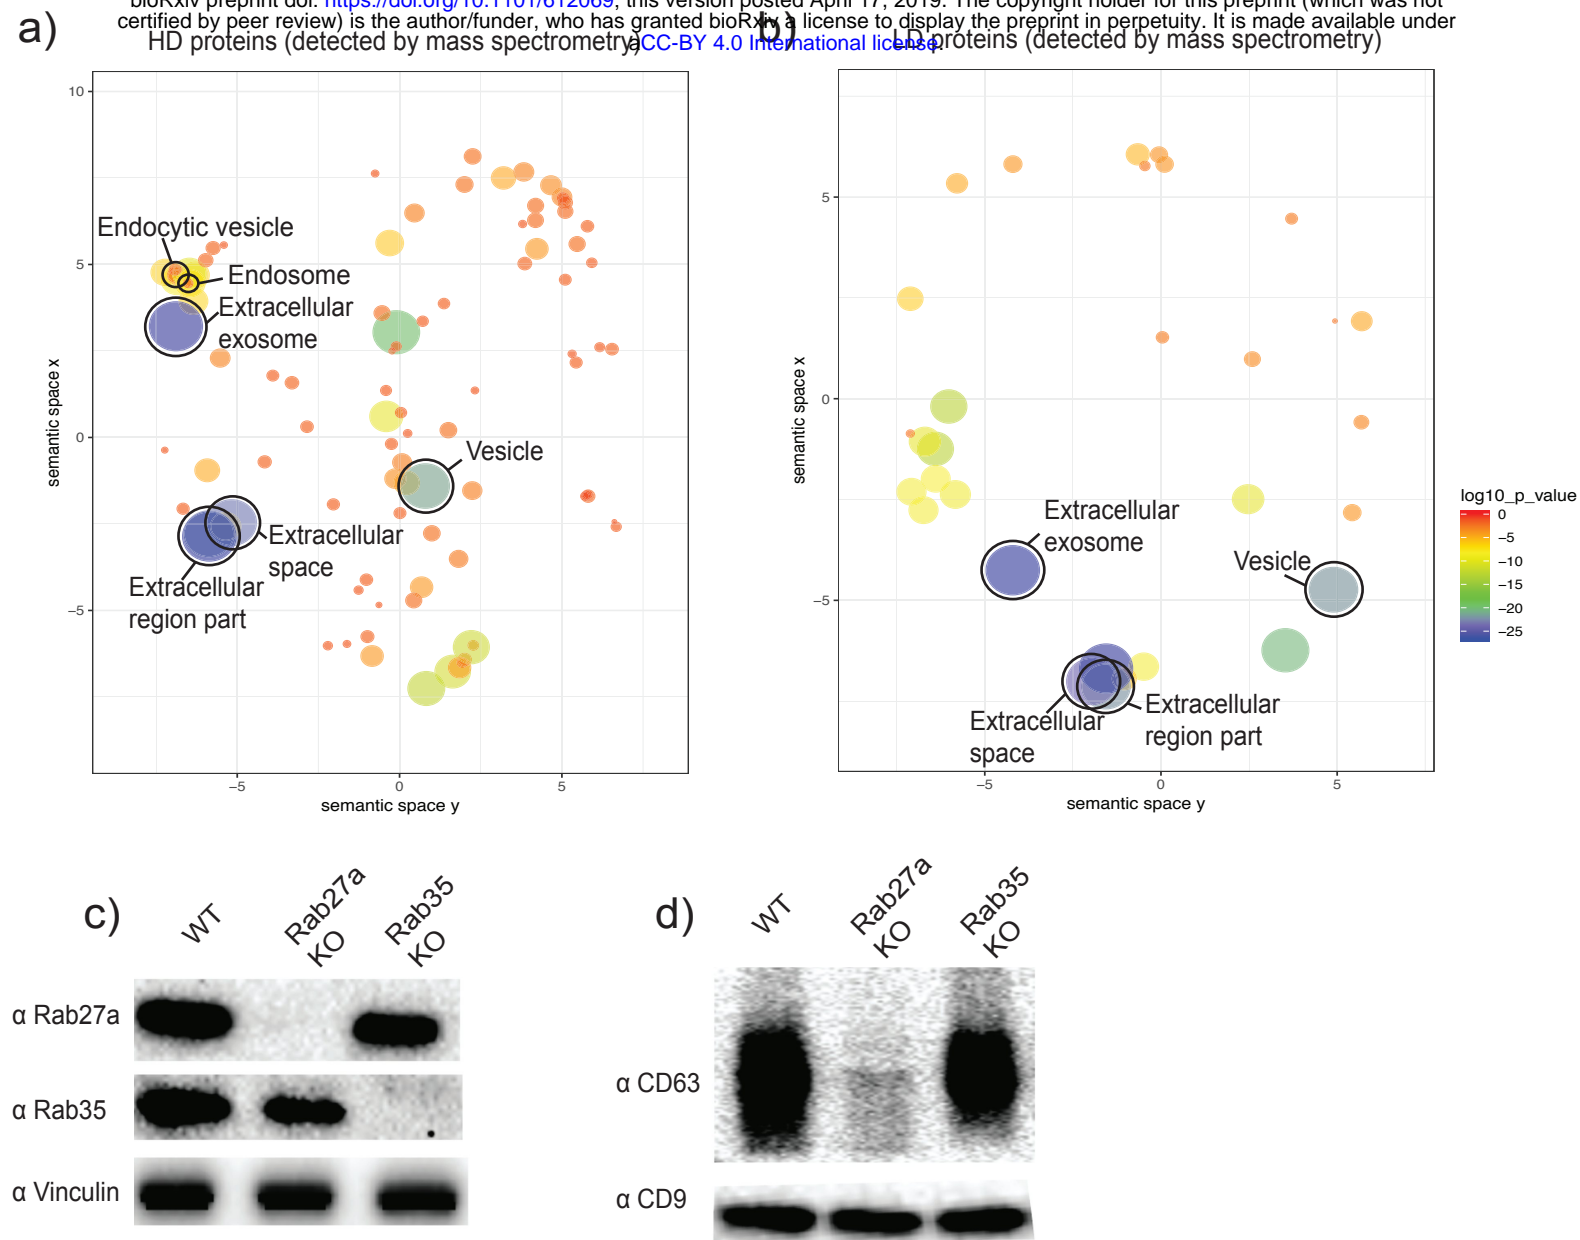

Figure 2. The two biochemically distinct EV sub-populations co-fractionate with membranes of different sub-cellular origin.

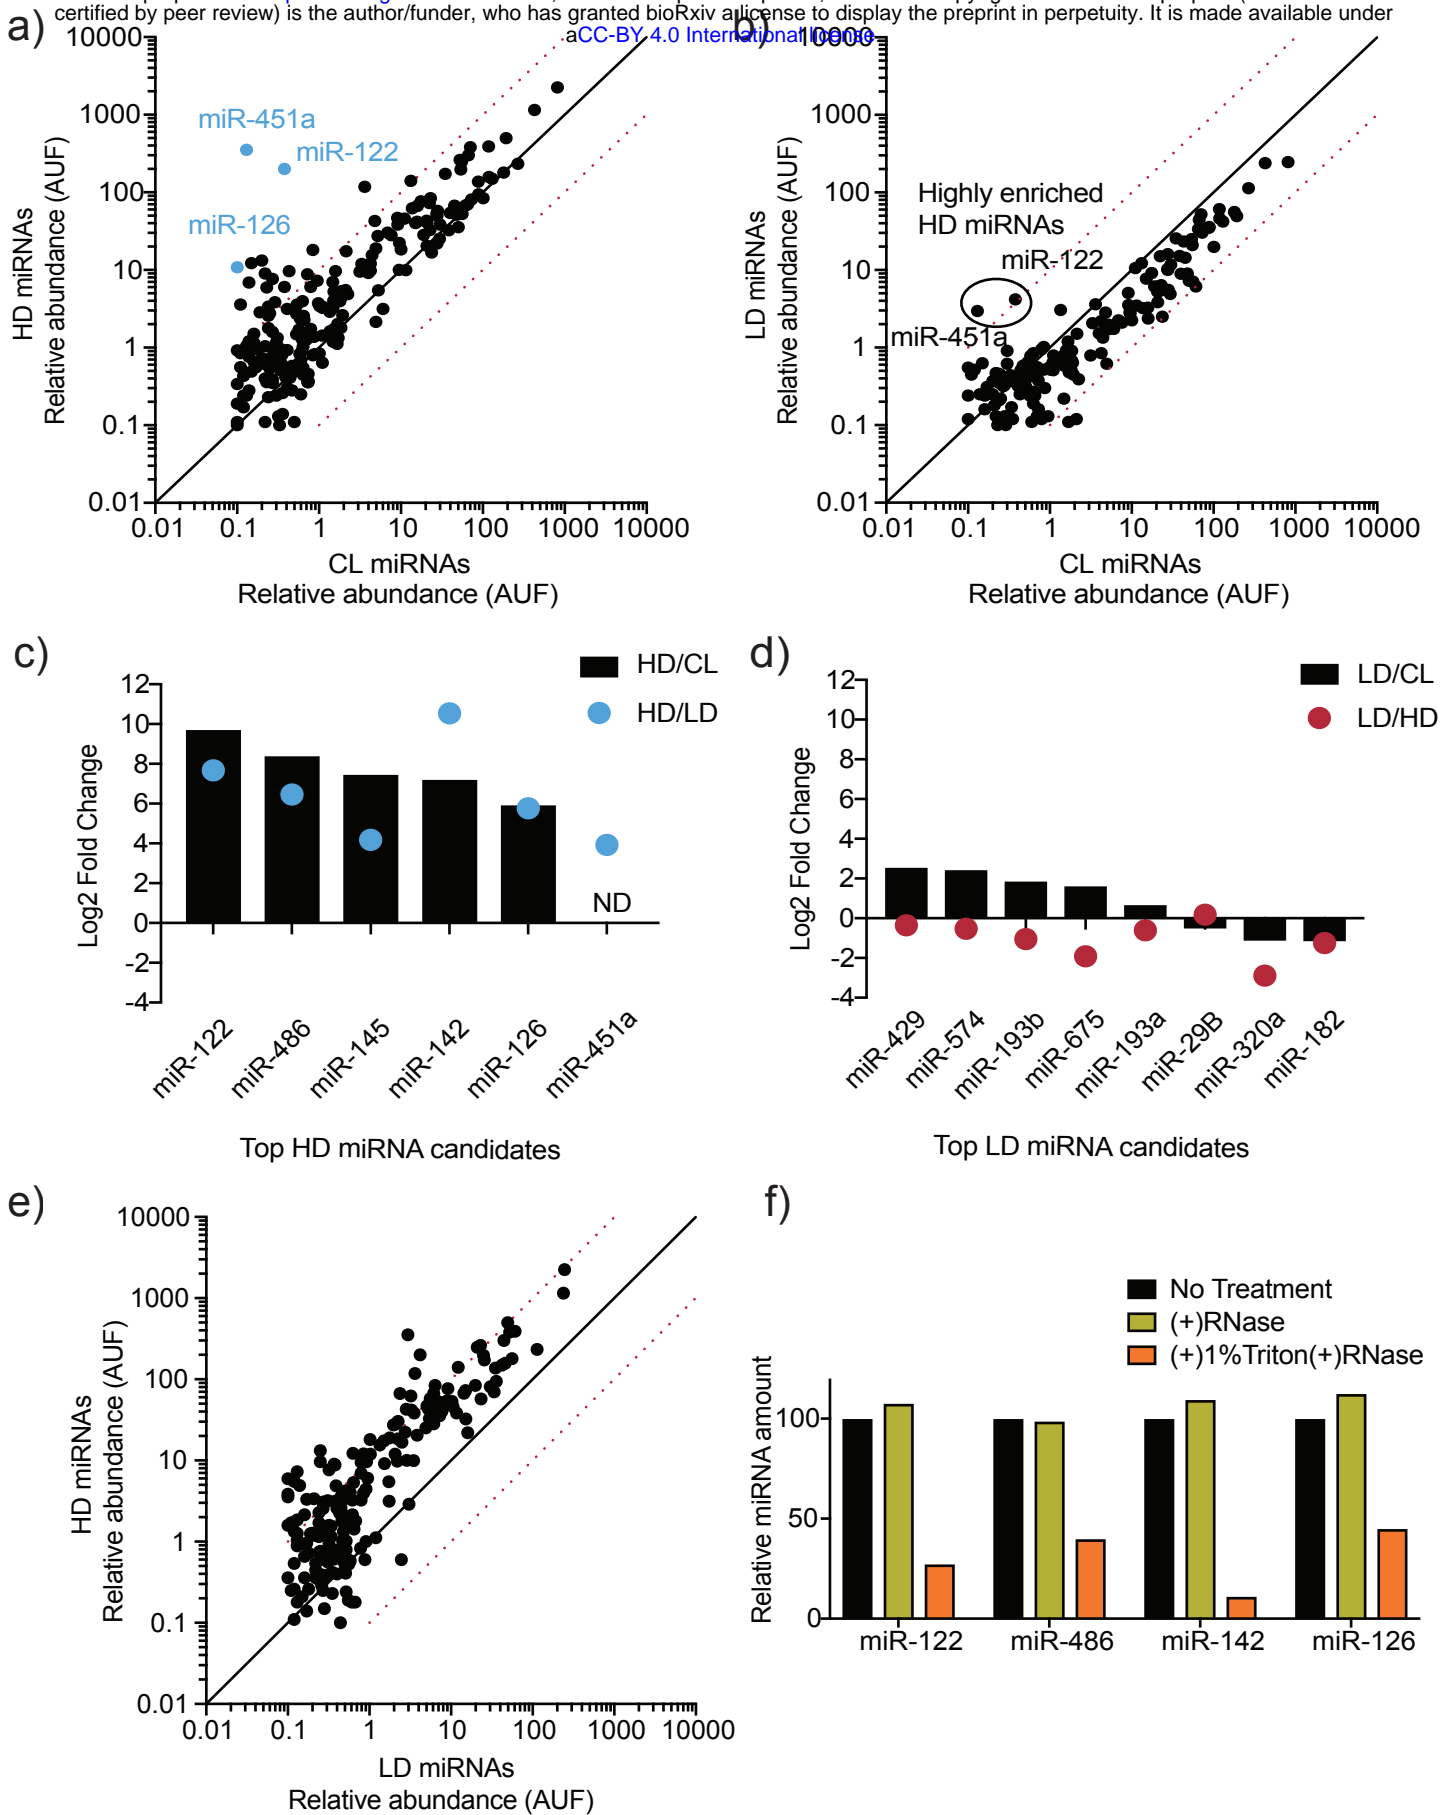

Figure 3. MicroRNA profiling of high buoyant density and low buoyant density EV sub-populations.



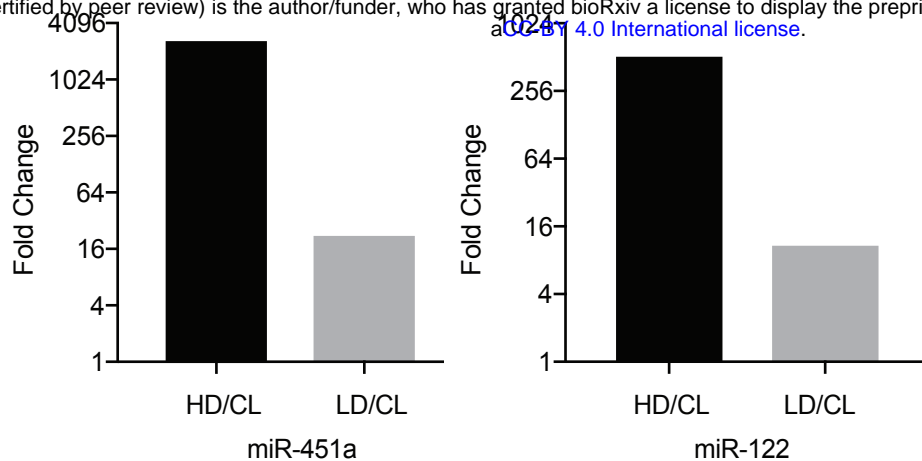

Figure 3 - figure supplement 1. MiR-122 and miR-451a are highly enriched in the HD sub-population.

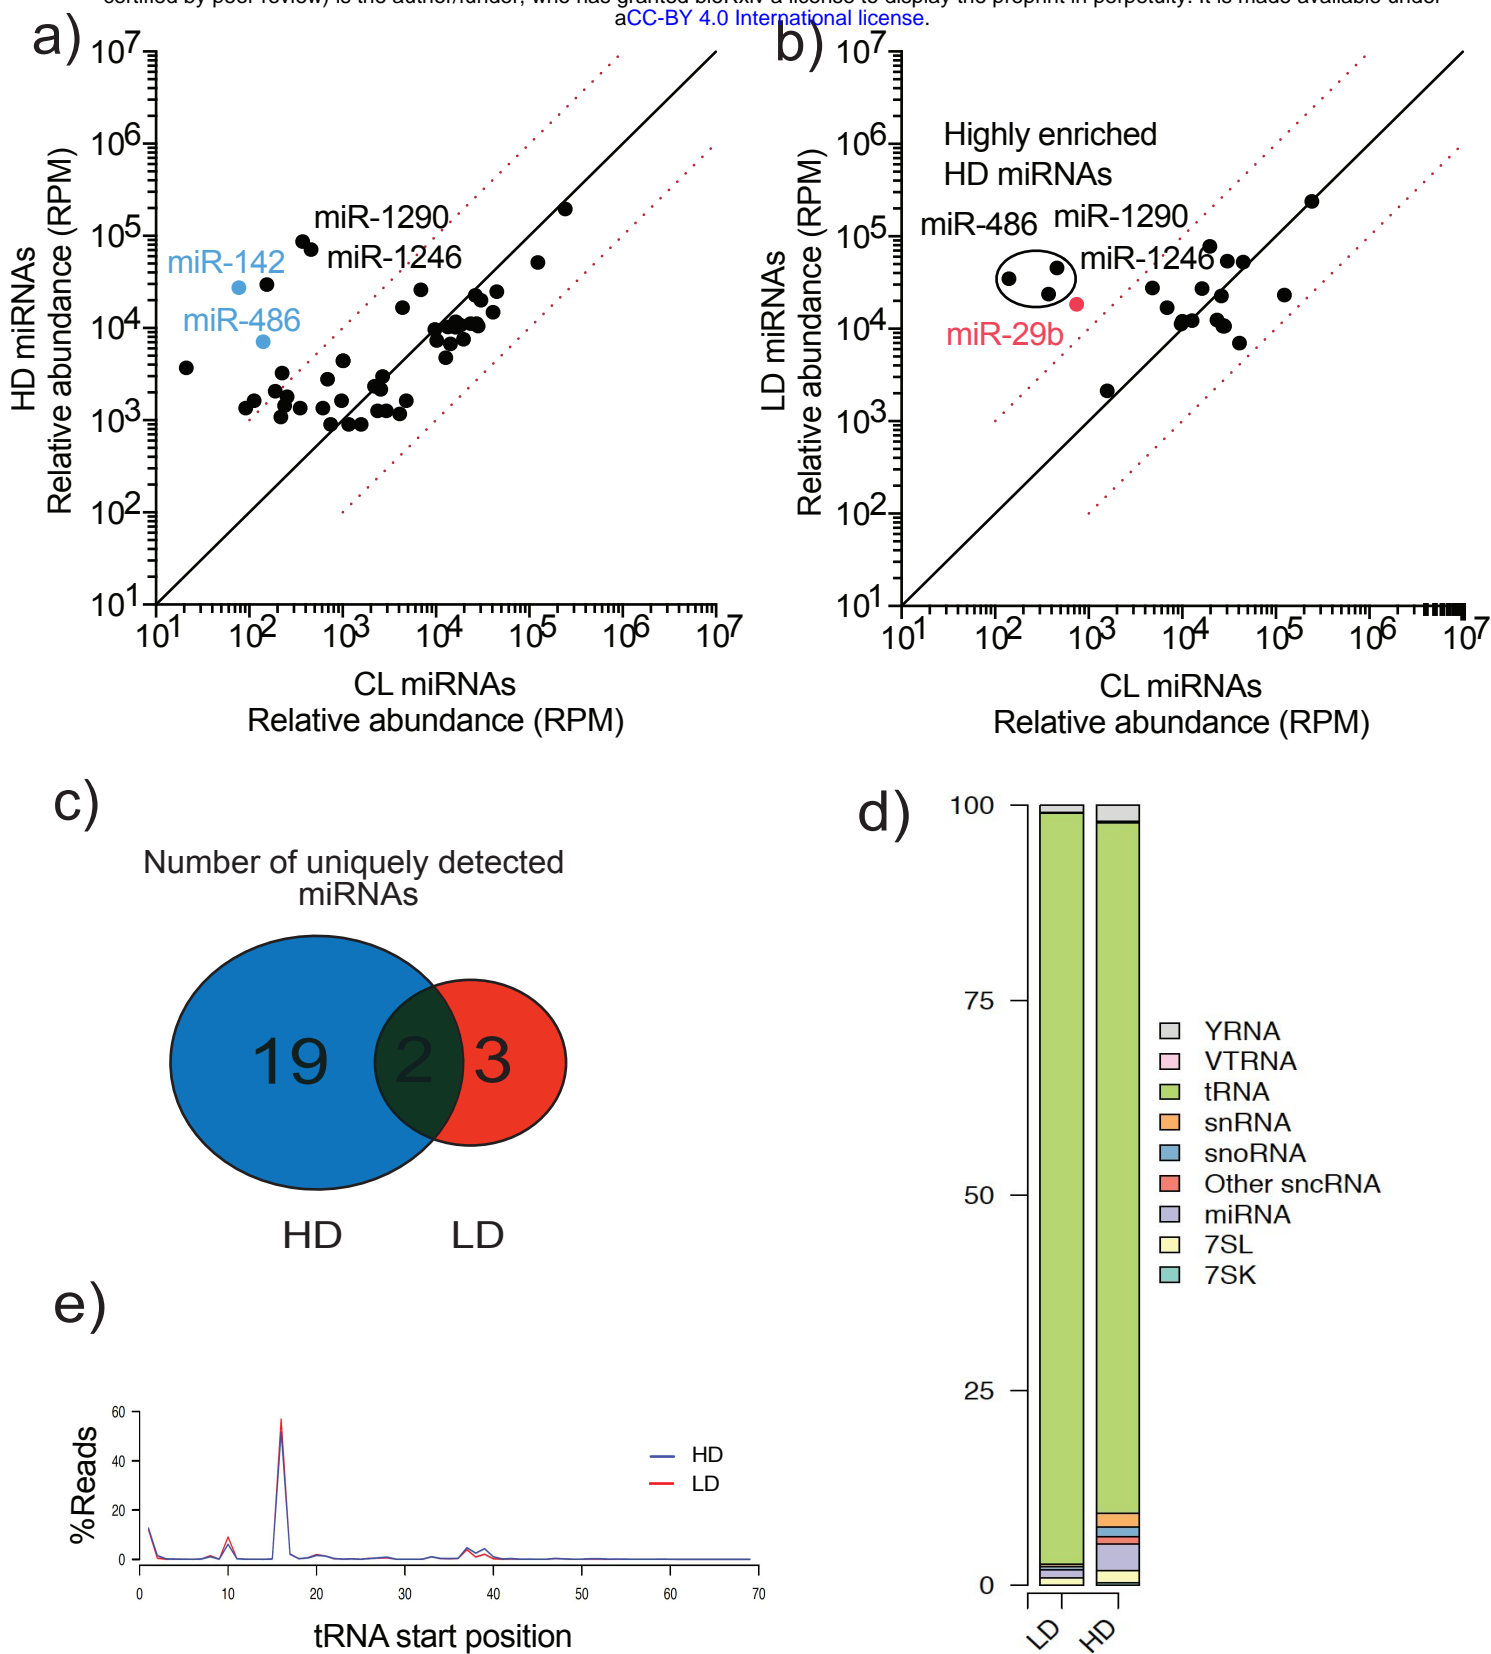

Figure 3 - figure supplement 2. TGIRT-sequencing of high buoyant density and low buoyant density EV sub-populations.

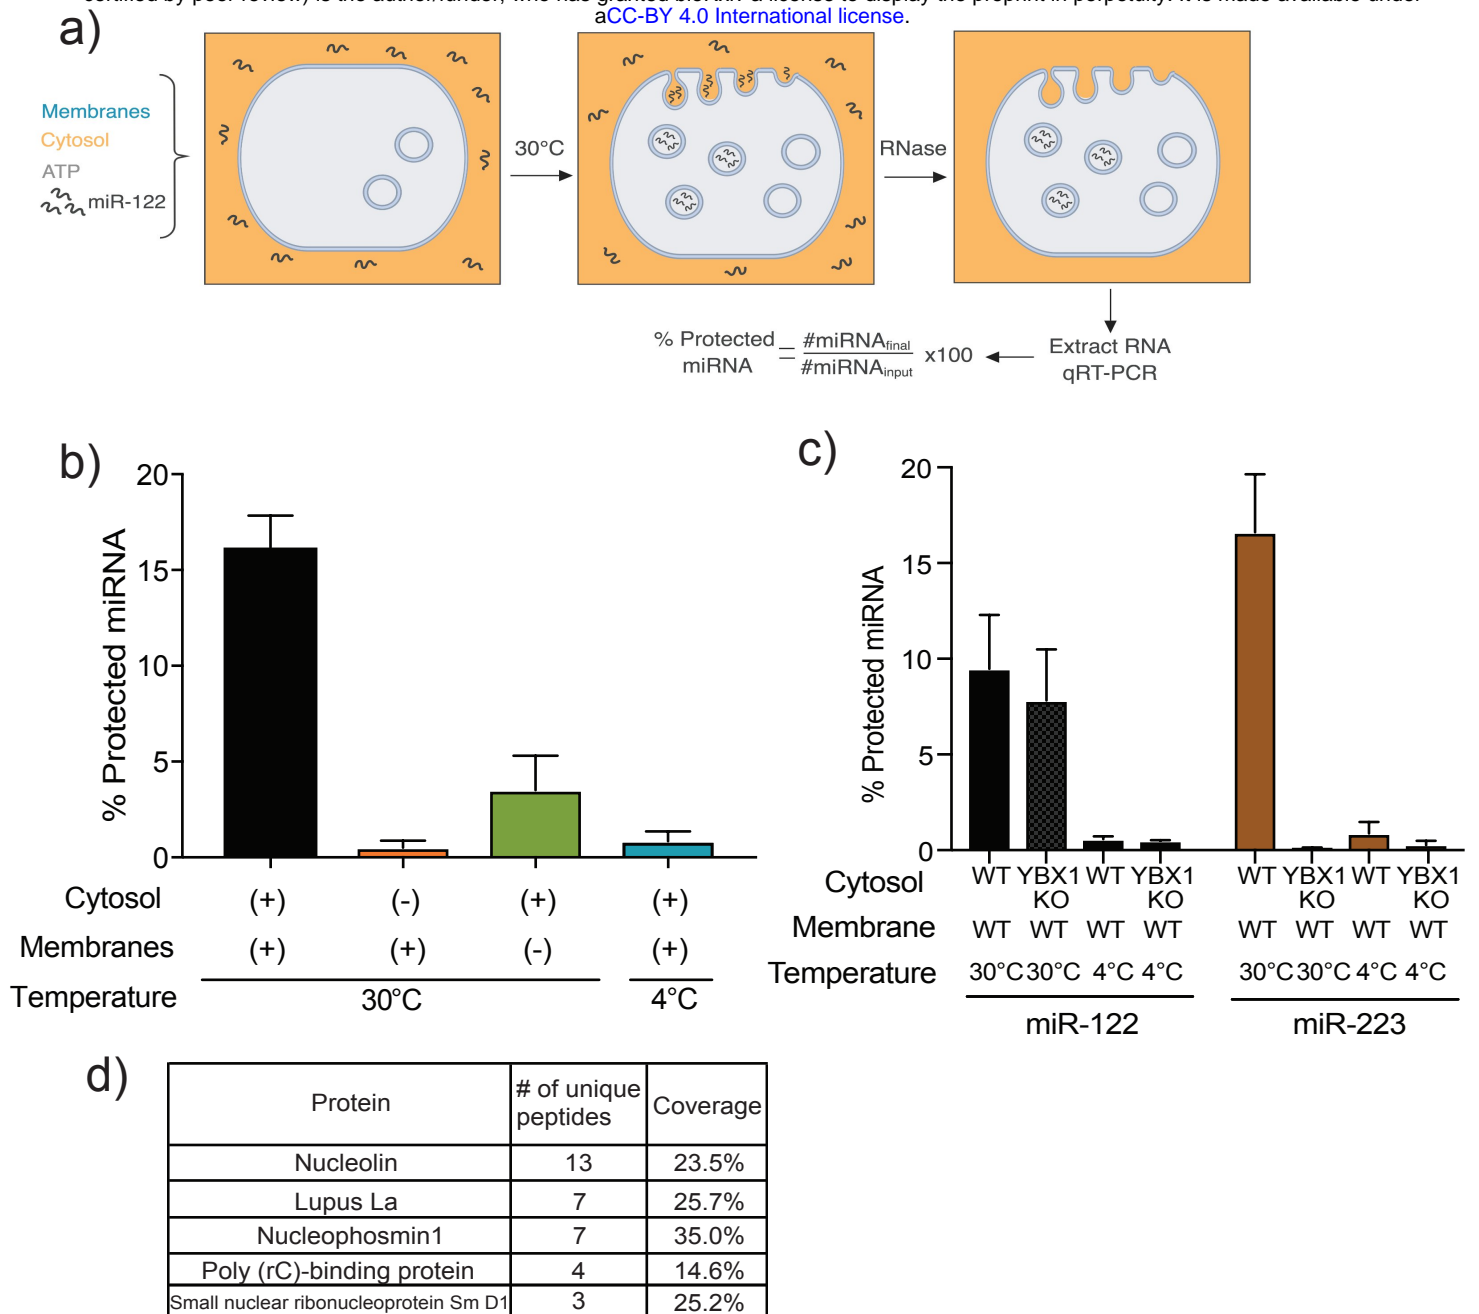

Figure 4. miR-122 packaging is recapitulated in a cell-free reaction.

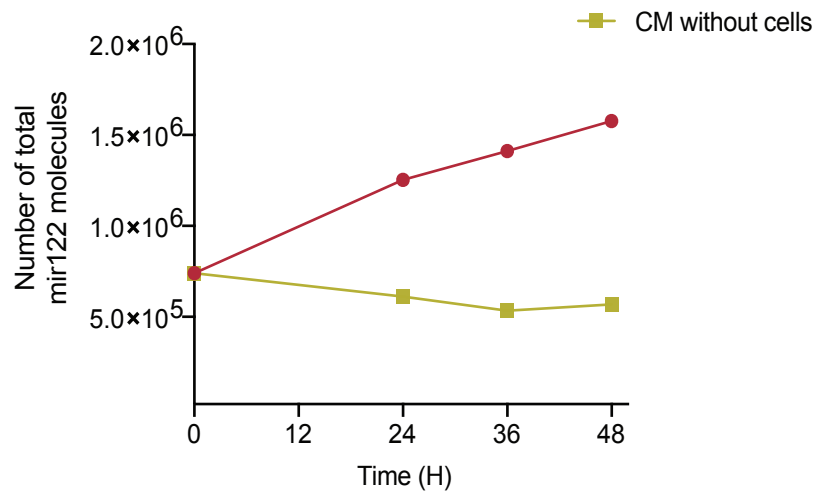

Figure 4 - figure supplement 1. MiR-122 accumulates in conditioned media over time.

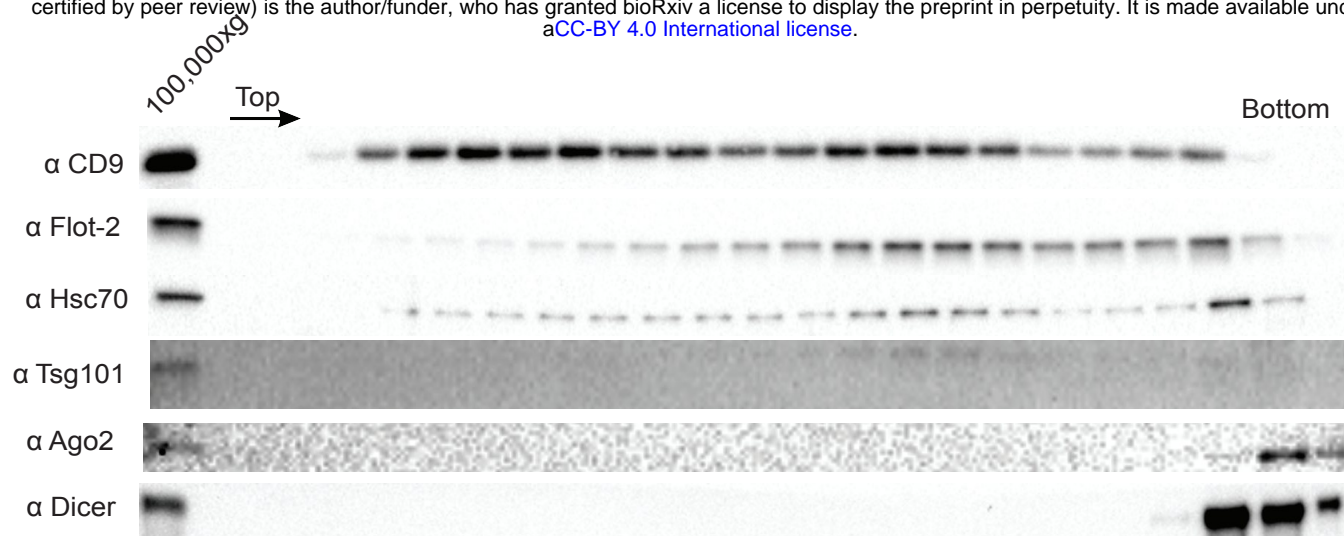

Figure 4 - figure supplement 2. Ago2 and Dicer are not EV-associated in MB-MDA-231 cells.

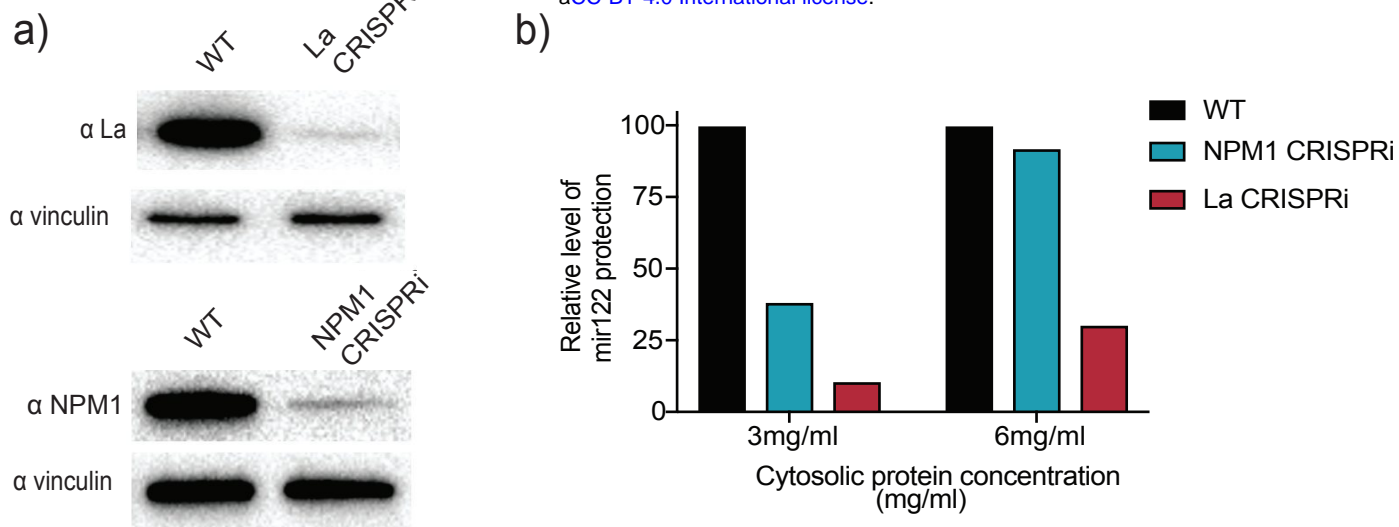

Figure 4 - figure supplement 3. CRISPRi efficiently depletes the RNA-binding protein candidates.

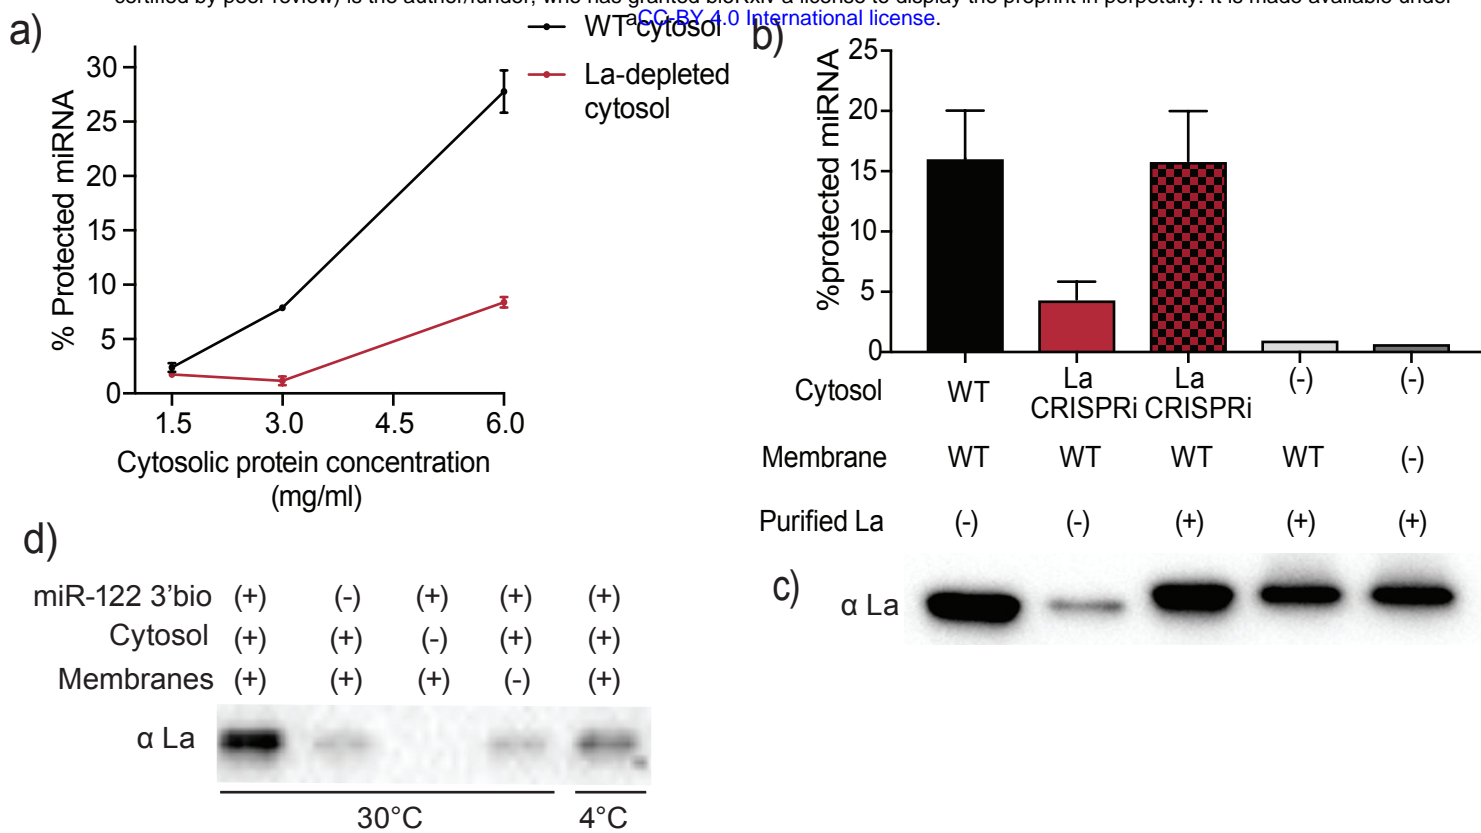

Figure 5. Sorting of miR-122 into EVs *in vitro* requires La.

a)

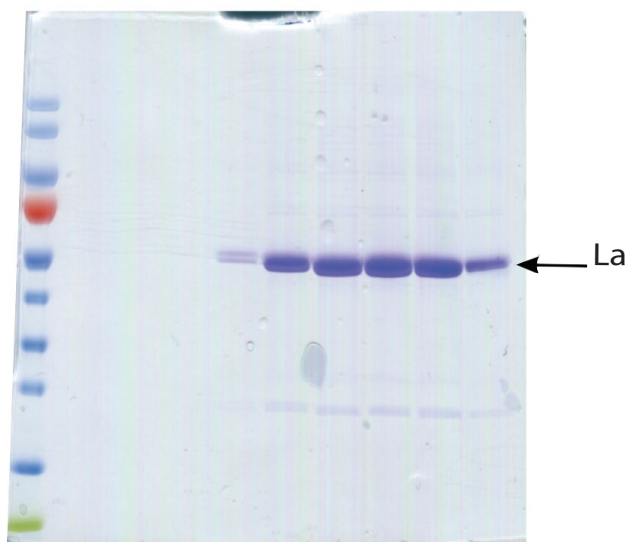

Figure 5 - figure supplement 1. Purification of heterologously expressed La.



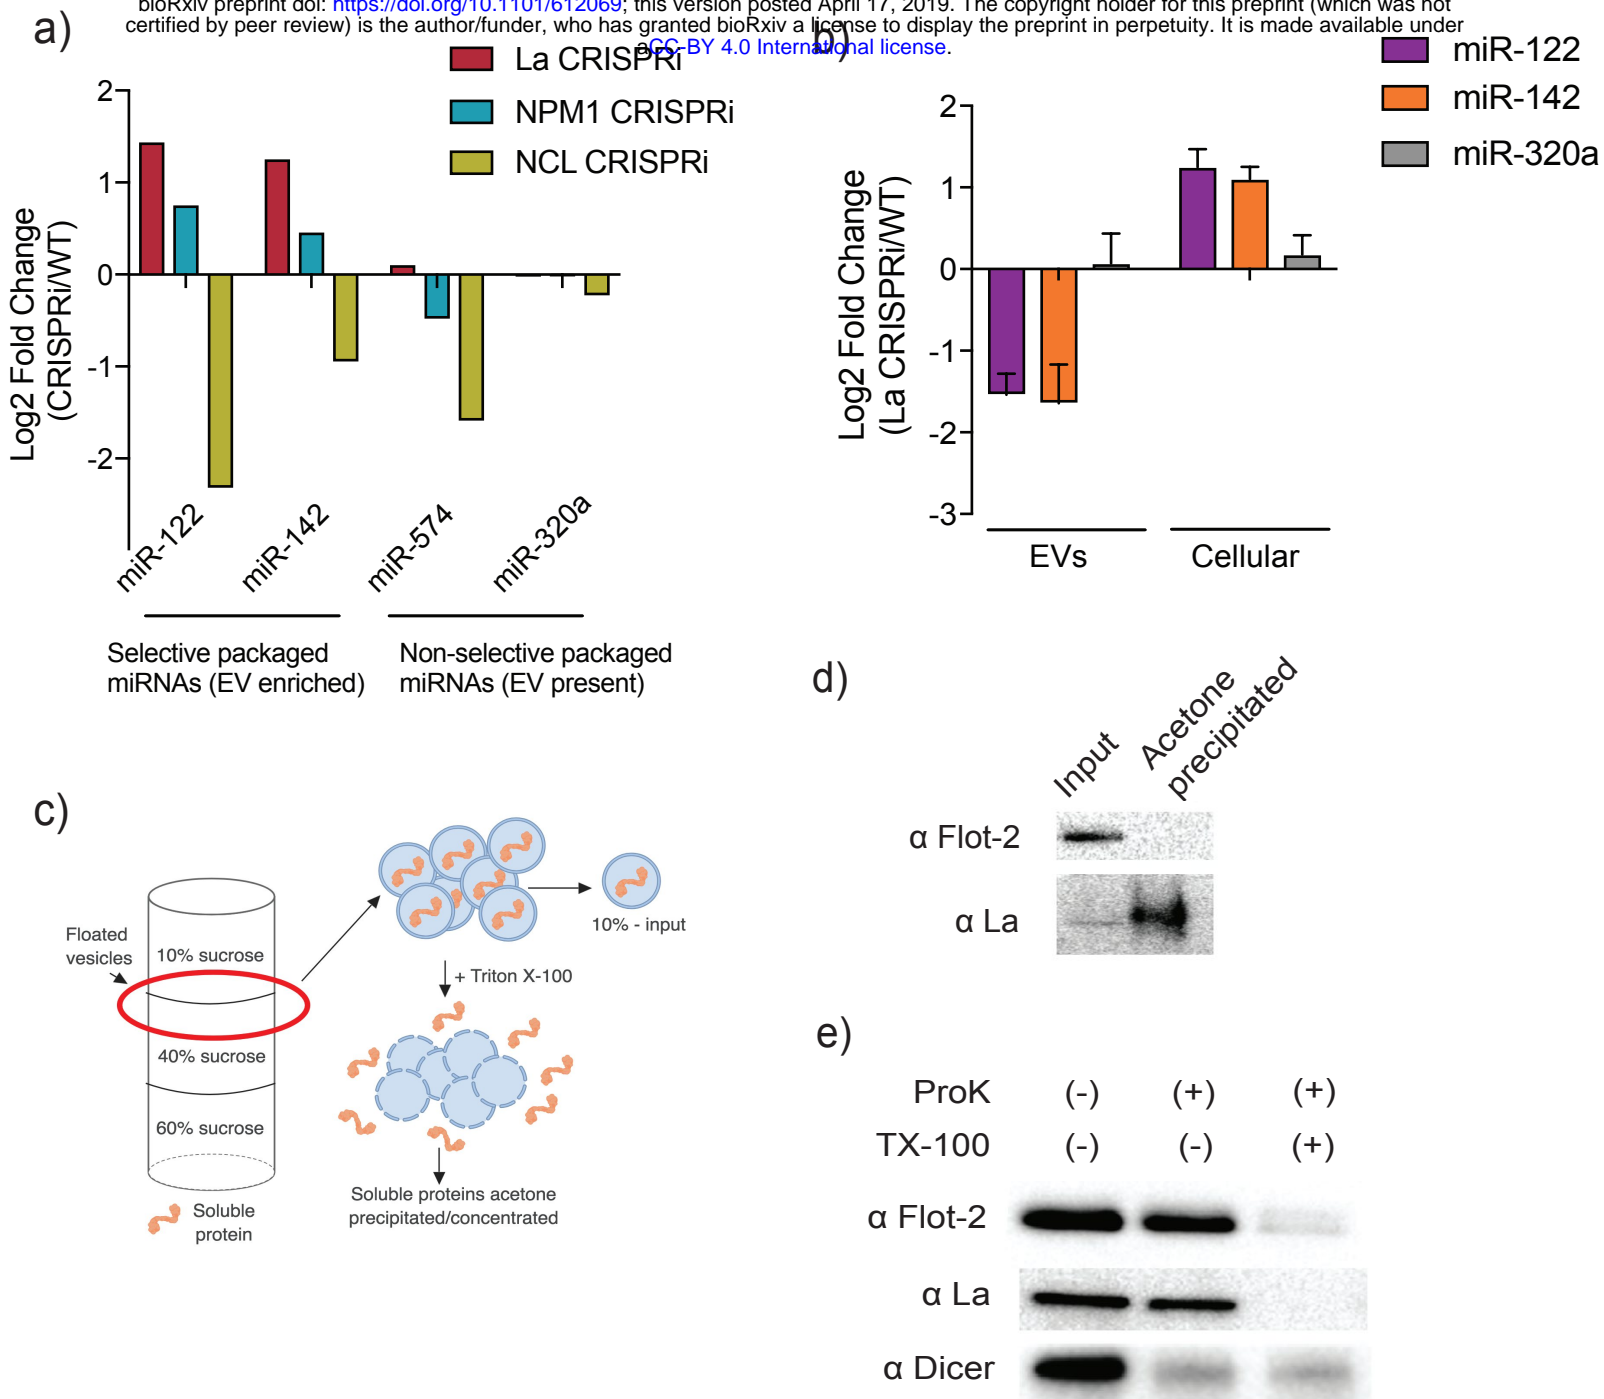

Figure 6. MiR-122 sorting into EVs requires La *in vivo*.

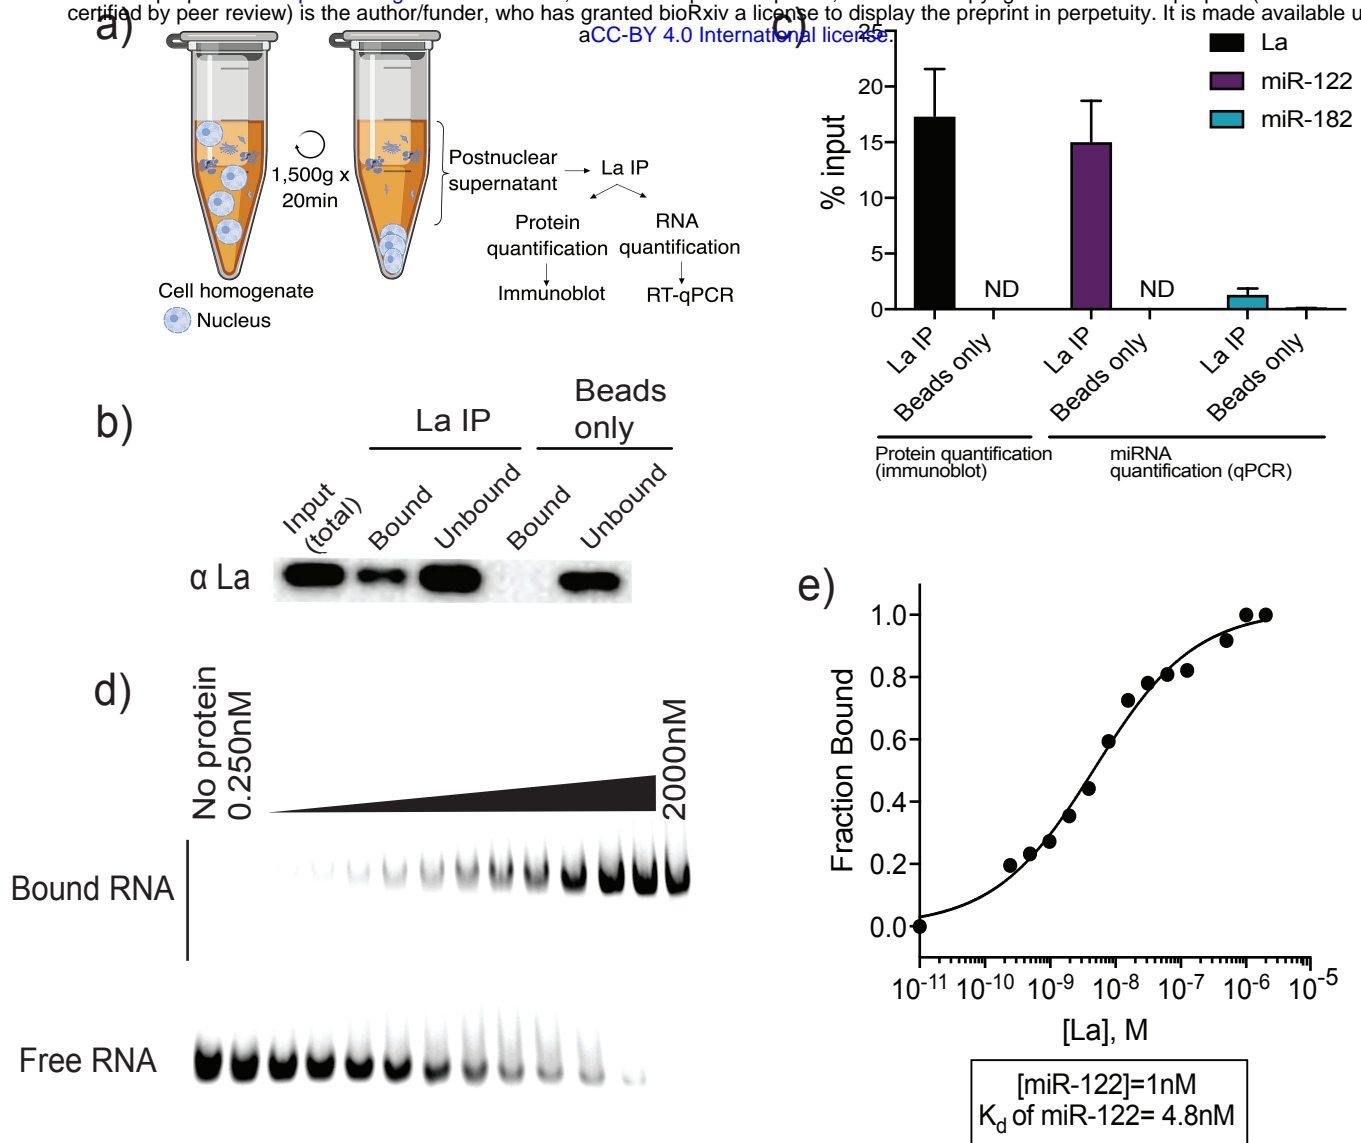

Figure 7: La interacts with miR-122 *in vitro* and *in vivo*.

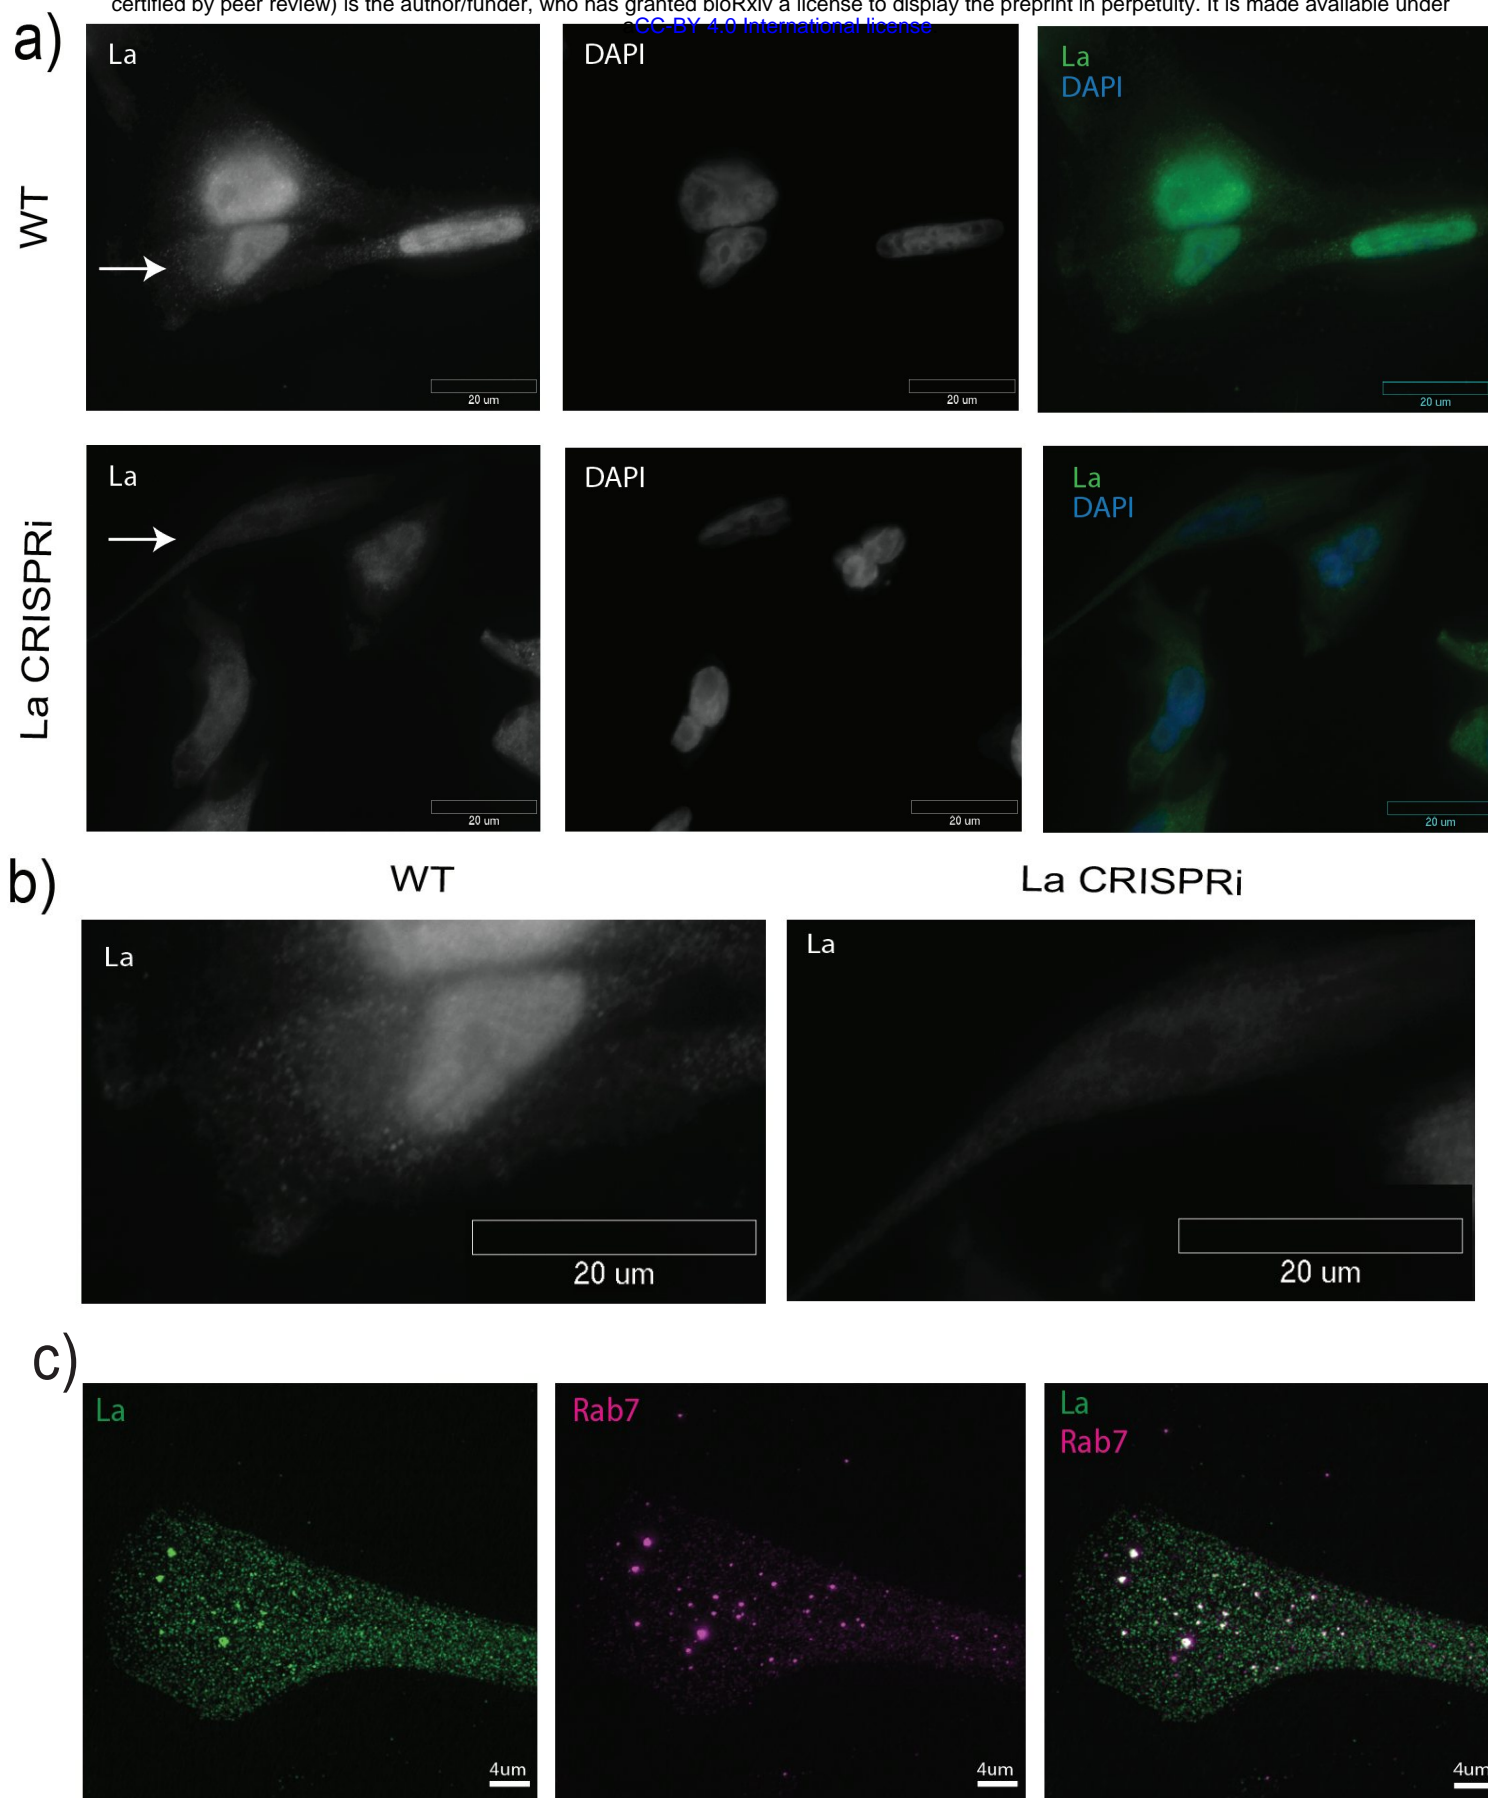

Figure 7 - figure supplement 1. Detection of nuclear and cytoplasmic La by immunofluorescence.

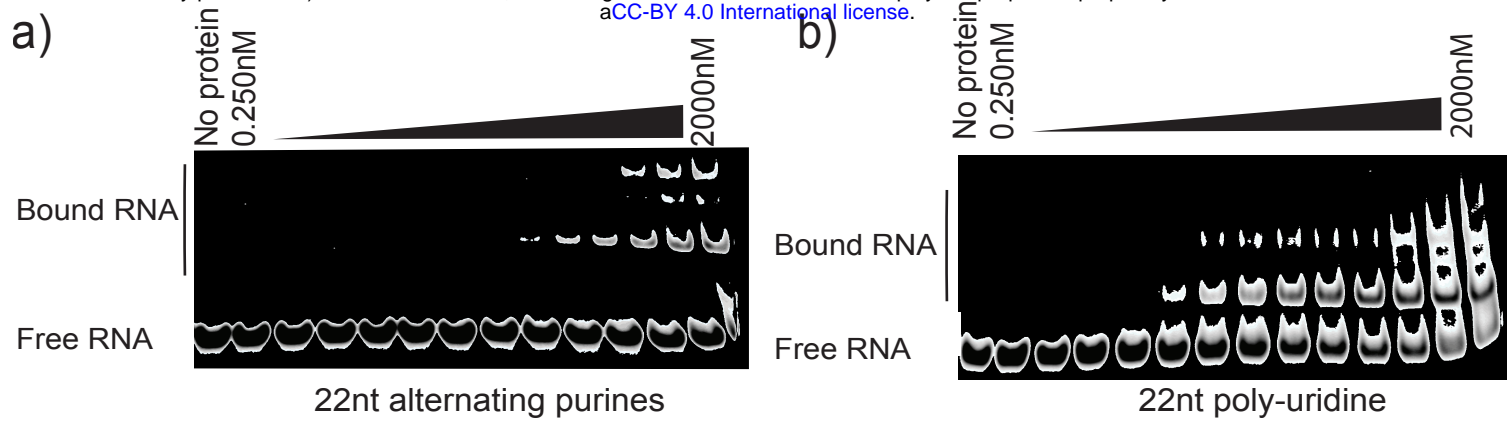

Figure 7 - figure supplement 2. Controls for La specificity during EMSA.

a) miR-122 uggagugugacaauggguguuug  
3'mut uggagugugacaaugggugaaag  
5'mut acacgugugacaauggguguuug

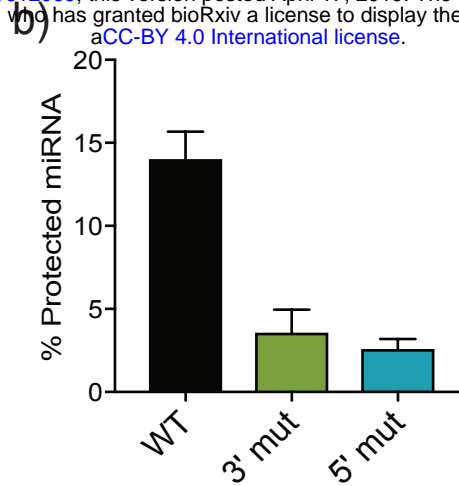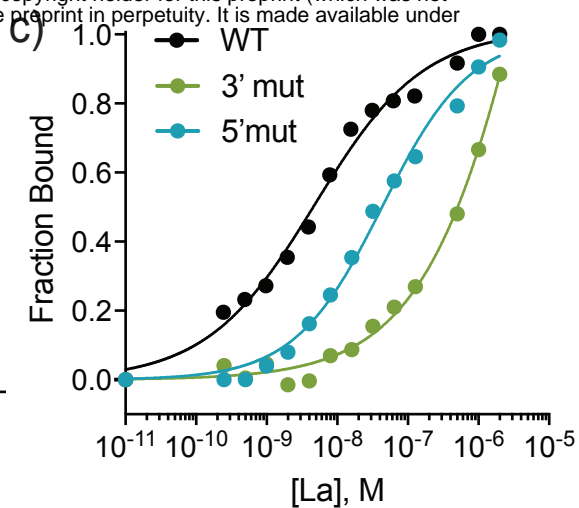

Figure 8. A bipartite motif in miR-122 is required for its packaging and interaction with La *in vitro*.

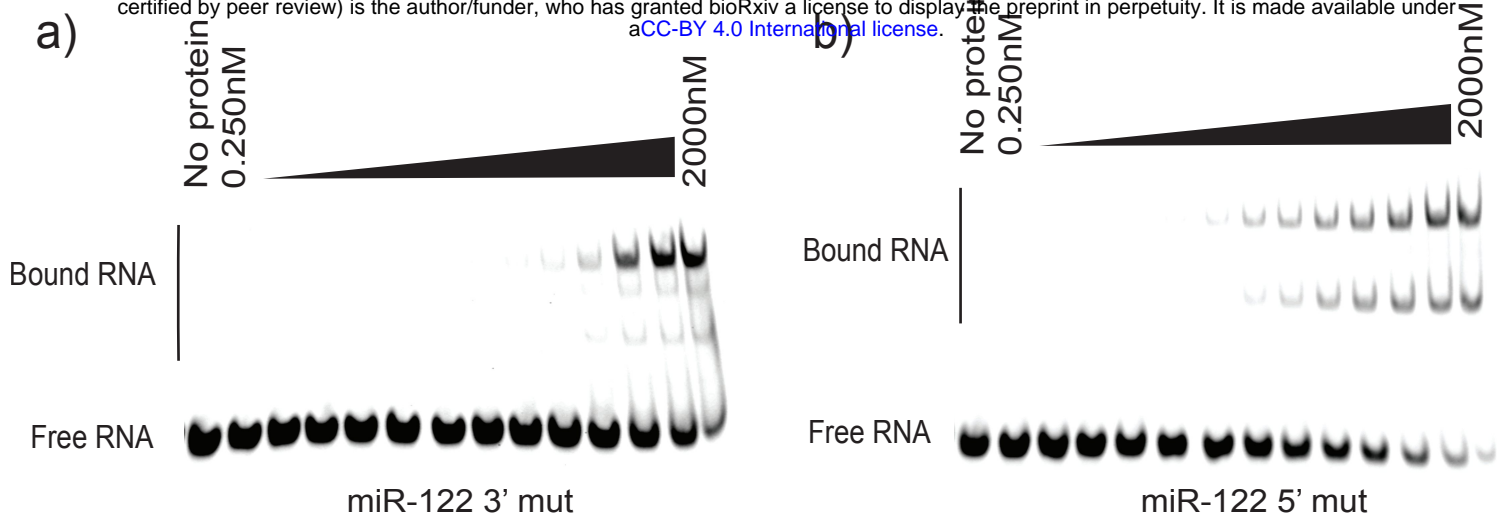

Figure 8 - figure supplement 1. EMSA for miR-122 mutated versions.

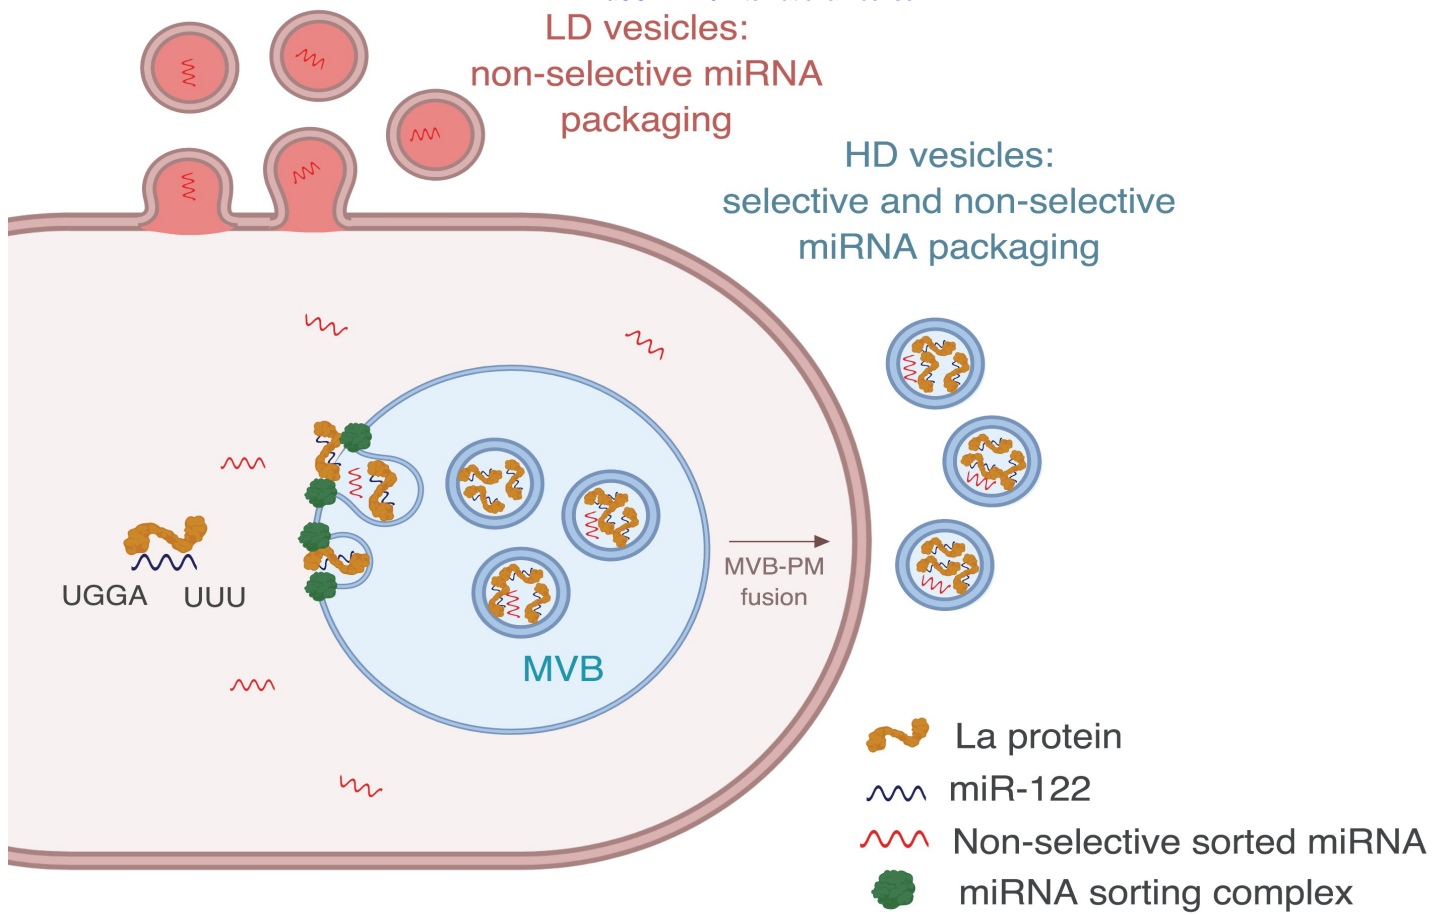

Figure 9: Diagram representing the current model of miRNA sorting into extracellular vesicles derived from MDA-MB-231 cells.
